# Supplementary material for: Insights into the evolution and spatial chromosome architecture of jujube from an updated gapless genome assembly
Source: PubMed Central journal article supplement — Plant Commun. 2023 Jul 23;4(6):100662. doi: 10.1016/j.xplc.2023.100662 (PMC10777365; doi:10.1016/j.xplc.2023.100662), 2023-07-23
Supplement: mmc2.pdf [file mmc2.pdf]

# Insights into the evolution and spatial chromosome architecture of jujube from an updated gapless genome assembly

Dear Editor,

Jujube (*Ziziphus jujuba* Mill.), commonly called Chinese jujube, is a vital member of the Rhamnaceae family. It is famous for its tolerance to dry, barren, and saline-alkali soils, and its fruit has important nutritional and medicinal value. Recent fundamental research on jujube has involved assembly of draft genome sequences for the fresh-eating cultivar ‘Dongzao’ (Liu et al., 2014), dry-eating cultivar ‘Junzao’ (Huang et al., 2016), and wild sour jujube ‘Suanzao’ (Shen et al., 2021). However, genome evolution studies based on high-quality genome assemblies with large collinear regions have not been performed. Likewise, the spatial architecture of jujube chromosomes and its effect on gene transcription and regulation remain to be explored. Here, we report an updated gapless genome assembly of jujube (*Z. jujuba* Mill. Dongzao) and use it to characterize new features of jujube evolution and spatial chromosome organization.

The jujube genome size was estimated to be 411.6 Mb using 20.5 Gb (50 $\times$ ) clean MGISEQ-2000 paired-end reads (Supplemental Figure 1; Supplemental Table 1). A total of 28.6 Gb (70 $\times$ ) PacBio HiFi circular consensus sequencing (CCS) reads, 50.7 Gb (123 $\times$ ) Oxford Nanopore Technologies (ONT) ultra-long reads, and 43.4 Gb (105 $\times$ ) high-throughput chromosome conformation capture (Hi-C) data were obtained from the whole genome (Supplemental Table 1). We first produced a 417.6-Mb raw assembly from the HiFi reads, then removed contaminants, organelle sequences, and duplicated contigs. We next integrated the ONT and Hi-C data, generating a final assembly of 393 332 932 bp with an N50 (The sequence length of the shortest contig at 50% of the total assembly length) of 32.99 Mb. The assembly consisted of 12 gapless contigs, which we named Chr01–Chr12 in descending order of length (Supplemental information 1.1). BUSCO evaluation revealed 98.5% completeness of the genome (Figure 1A; Supplemental Table 2). Approximately 56.16% of the genome sequences were repetitive, of which 37.57% were transposon elements (Supplemental Table 3). A total of 29 633 protein-coding genes were predicted on the 12 chromosomes, and 27 500 (92.80%) were functionally annotated (Figure 1A and 1B). All telomere sequences, ranging from 4217 to 28 497 bp in length, were identified on the 12 chromosomes (Supplemental Table 4). Centromeres were predicted by considering both the long tandem repeats (Supplemental Table 5) and the Hi-C matrix, in which the highly repetitive centromere region is typically difficult to fully cover with Hi-C reads (Figure A4 of Supplemental information 1.1). The centromeres varied in length and contained diverse monomer sequences across different chromosomes (Supplemental Table 5). In addition, the centromere regions typically lacked genes, and different centromeres were enriched

in distinct types of repeats, such as retrotransposons with long terminal repeat (LTR) and without LTR (Supplemental Figure 2).

Using homologous genes from collinear genomic regions, we calculated synonymous substitutions per site ( $K_s$ ) and four-fold synonymous third-codon transversion rates (4DTV) for *Z. jujuba* Mill., *Populus trichocarpa*, and *Prunus persica*. Because the three available jujube genotypes, Dongzao, Junzao, and Suanzao, had similar  $K_s$  and 4DTV distributions, we will refer to them simply as “jujube” in this paragraph. All three species shared a common peak around  $K_s = 1.5$  and 4DTV = 0.5 (peak 2), with a median value of paralogous sequence similarity (MPSS) below 80%. *P. trichocarpa* showed a sharp peak around  $K_s = 0.27$  and 4DTV = 0.09 (peak 1), with an MPSS of approximately 90%, which has previously been reported as a recent species-specific duplication (Tuskan et al., 2006). This peak was absent in *P. persica*. We also identified a mini peak in jujube at approximately  $K_s = 0.15$  and 4DTV = 0.05, which was more recent than *P. trichocarpa* peak 1 (two peaks for Dongzao, MPSS 90% and 98%) (Figure 1C–1E). The paralogous genes surrounding this mini peak accounted for approximately 20% of those surrounding jujube peak 2 (Supplemental Table 6). Jujube has been speculated to lack species-specific genome-wide duplications (Liu et al., 2014). However, owing to the highly fragmented genome assembly, this conclusion may not reflect the true evolutionary process. The mini peak, although it represents only a small-scale duplication, highlights the different evolutionary processes after the speciation events of jujube and *P. trichocarpa* (*P. persica*). *P. trichocarpa* underwent a new, recent round of genome-wide duplication, whereas *P. persica* showed no signs of new duplication. Jujube evolved more slowly than *P. trichocarpa* but faster than *P. persica*, and we speculate that the mini peak represents an ongoing duplication in jujube. The  $K_s$  and 4DTV peaks of Dongzao relative to Suanzao (Junzao), representing the speciation event, were both close to the y axis (Figure 1C and 1D). This suggests that the three individuals, whether cultivated or wild, are not fully separated at the species level compared with the separation between *Z. jujuba* and *Ziziphus mauritiana* (Supplemental information 1.2). This finding provides insight into the controversial taxonomic issue of whether jujube and wild jujube belong to the same species (Supplemental information 1.2).

We used the 143.5 Mb of Hi-C reads (Supplemental Table 1), ultimately employing 61 Mb of valid pairs (41.80%) for further analysis (Supplemental Table 7). The interaction signals were

---

Published by the Plant Communications Shanghai Editorial Office in association with Cell Press, an imprint of Elsevier Inc., on behalf of CSPB and CEMPS, CAS.

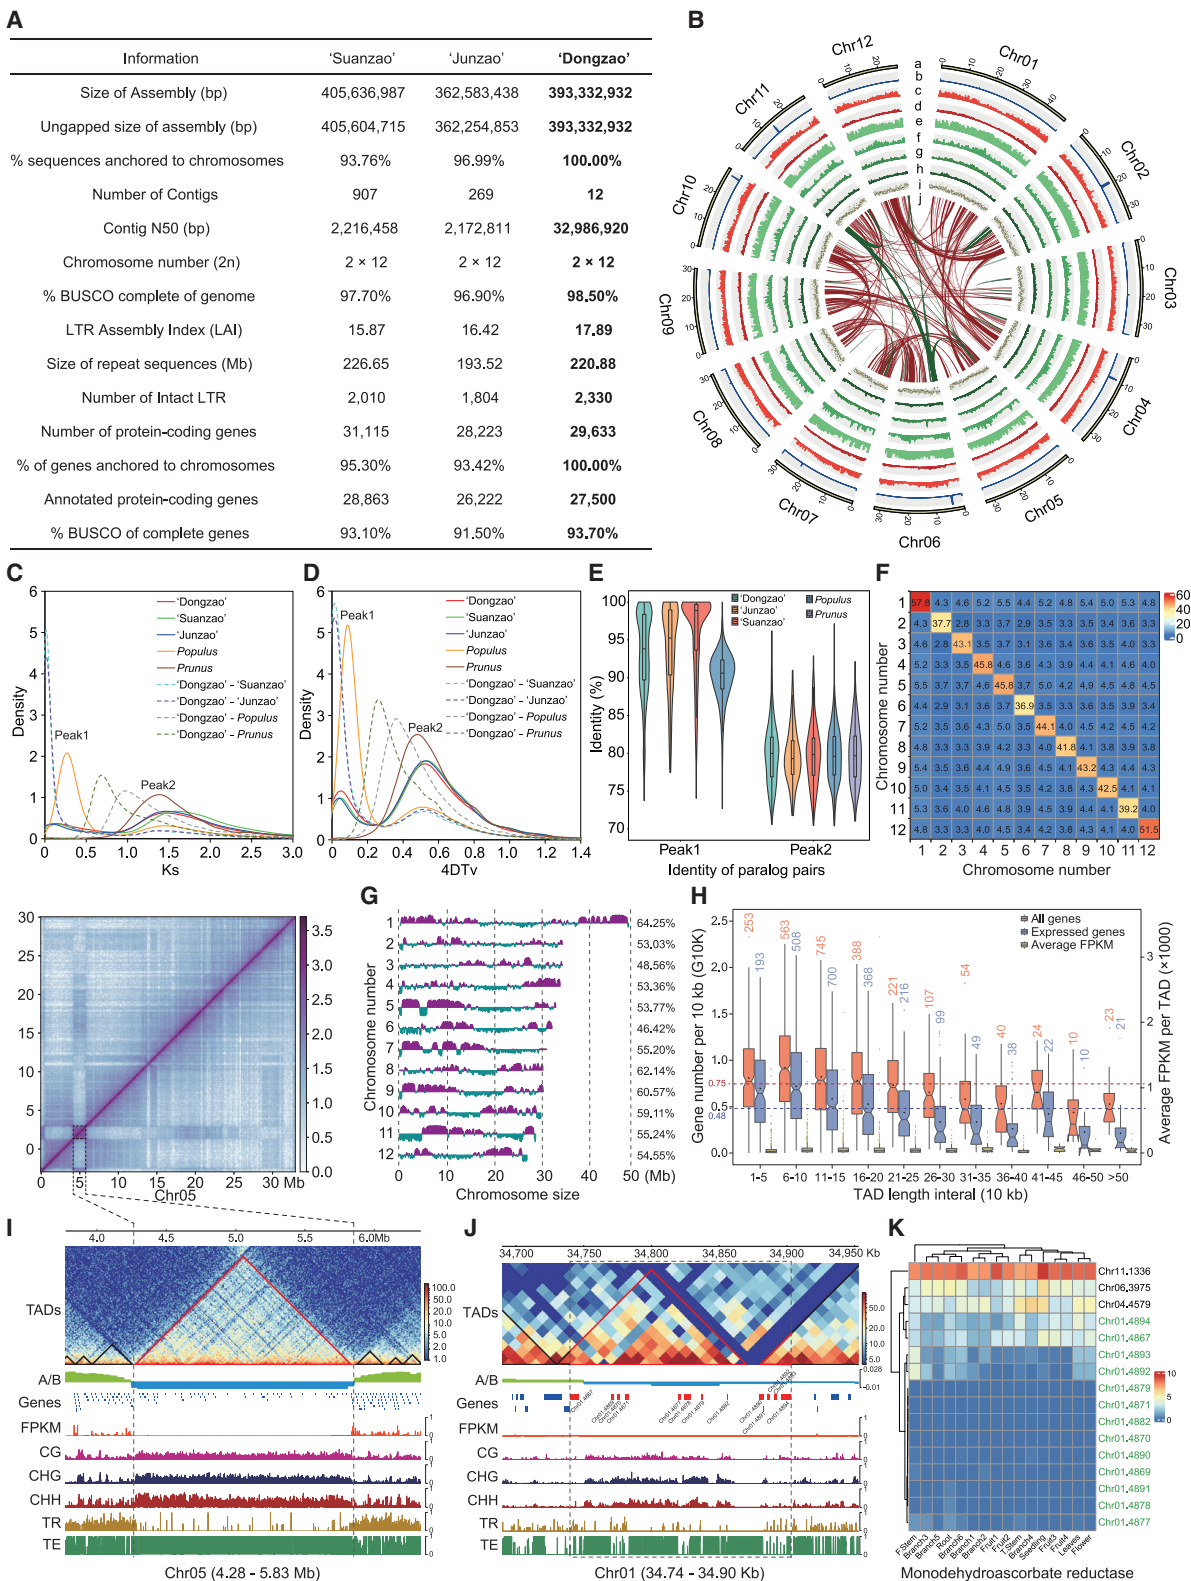

**Figure 1. Assembly, annotation, evolutionary insights, and spatial chromosome analysis of the jujube T2T gapless genome.** (A) Jujube genome data. The genomes of Junzao and Suanzao were reannotated using the same method as the updated Dongzao genome. (B) Circular plot of jujube chromosomes (Chr). (a) The twelve chromosomes in proportion to their actual lengths; (b) telomeres and putative centromeres; (c) genes; (d) protein-coding regions; (e) total repeats; (f) Gypsy repeats; (g) Copia repeats; (h) intact long-terminal repeats; (i) genomic GC content between 30% and 40%; and (j) genome-wide collinear blocks, with green and red representing mini and second peaks, respectively.

(legend continued on next page)

much stronger along the main diagonals than in other regions, and the inter-chromosome interaction strength was typically <10% of the intra-chromosome interaction strength (Figure 1F). The A and B compartments accounted for 55.75% and 44.25% of the total genome, respectively, and showed a diverse distribution. The ends and middles of chromosomes 1, 5, 9, and 10 were typically clustered toward the A and B compartments, respectively, whereas other chromosomes exhibited an interleaved distribution of the two compartments (Figure 1G). The chromatin was partitioned into 2428 topologically associating domains (TADs) with a mean length of 149.8 kb, comprising 27 203 genes and representing 92.47% of the genome size (Supplemental Table 8). As reported for the rice genome (Liu et al., 2017), genes along the TAD borders and boundaries were less methylated and showed higher expression than those in TADs (Supplemental Figures 3 and 4).

One noteworthy feature of the jujube TADs was the general decrease in gene count with increasing TAD size for both total and expressed genes. We divided the TADs into 11 length intervals and investigated the number of genes per 10 kb (G10K). The G10K value of TADs was 0.75, consistent with that at the whole-genome level (0.74). However, in TADs >200 kb, G10K values were all below 0.75 and generally decreased with increasing TAD size. However, average gene expression did not appear to differ among length intervals, suggesting that TAD size influenced gene number but not gene expression (Figure 1H).

The largest TAD, located on chromosome 5 between 4.28 and 5.83 Mb, had robust internal interactions with strong signals and weak interactions with other regions; all regions were in the B compartment, surrounded by abundant methylations and transposons (Figure 1I). All 51 predicted genes were either not expressed or were expressed at low levels; alignment to the jujube chloroplast genome revealed that this TAD primarily comprised horizontally transferred chloroplast sequences and degenerated chloroplast genes (Supplemental Figure 5; Supplemental Table 9). This is the first report of chloroplast sequences in the plant nucleus that are structured as a large compact TAD and serves as a foundation for further studies on transferred chloroplast sequences in the nucleus.

One of the most essential traits of jujube fruit is its high vitamin C content (Liu et al., 2014). The monodehydroascorbate reductase (MDHAR) family, which is involved in the vitamin C recycling pathway (Li et al., 2010), has been reported to contain eight specific members in jujube that are not present in other species (Liu et al., 2014). Our assembly brought this number to 13, six of which correspond to the previous eight members

(Supplemental Figure 6; Supplemental Table 10). The 13 MDHAR family members were distributed in two TADs with frequent interaction among one another and were tandemly packed over a 163-kb region, uninterrupted by other genes. Chr01.4867 was the only gene in the cluster that was found in the A compartment, and it had the highest expression. All others were in the B compartment and showed extensive methylation, and the majority showed low or no expression (Figure 1J and 1K). The remaining three genes were orthologs shared with other species; one of them, Chr11.1336, was highly expressed in all tissues and is potentially the most important member of the MDHAR family (Figure 1K). These patterns of jujube-specific MDHAR gene expansion and distribution provide new evidence to support further research on the mechanism of vitamin C accumulation in jujube.

### ACCESSION NUMBERS

The genome assembly and related raw sequencing data are deposited at the National Genomics Data Center (NGDC) under BioProject PRJCA016173. The annotation files for protein-coding genes, along with other related files for genome assembly validation, have been stored in the figshare, an online data repository, at <https://figshare.com/s/56c2299b47a5efd8708f>.

### SUPPLEMENTAL INFORMATION

Supplemental information can be found online at <https://doi.org/10.1016/j.xplc.2023.100662>.

### FUNDING

This work was supported by the general program of the Natural Science Foundation of Hebei Province, China (C2022204030); the general program of the National Natural Science Foundation of China (32171817); special research projects for the new talent of Hebei Agricultural University, Hebei Province, China (YJ2020025); the China Agricultural Research System (CARS-30-2-07); and grants from the Hebei Province Key R&D Program (21326304D).

### AUTHOR CONTRIBUTIONS

M.Y. and M.L. conceived the project; M.Y., L.D., S.H., J.Z., L.H., P.L., and Z.Z. prepared the samples and performed the experiments; M.Y., L.H., S.Z., and B.L. performed the bioinformatics analysis; M.Y. wrote the paper; and M.L. revised the paper. All authors reviewed and approved the paper.

### ACKNOWLEDGMENTS

No conflict of interest is declared.

Received: May 3, 2023

Revised: July 17, 2023

Accepted: July 20, 2023

Published: July 23, 2023

**(C and D)** Distributions of synonymous substitutions per site (Ks) **(C)** and four-fold synonymous third-codon transversion rate (4DTv) **(D)**. The solid and dashed lines represent duplication and speciation events, respectively.

**(E)** Identity percentages of paralogs.

**(F)** Quantification of interactions between pairs of chromosomes.

**(G)** A/B compartments of the 12 chromosomes. The upward purple and downward blue regions represent the A and B compartments, respectively; density values range from  $-0.03$  to  $0.03$ . The percentage of the A compartment for each chromosome is indicated on the right-hand side of the graph.

**(H)** Gene number and expression of different TAD length intervals. Black dot in each boxplot denotes the average value.

**(I)** TAD between 4.28 and 5.83 Mb of chromosome 5 (between dashed lines). A/B, A/B compartments; CG, CHG, and CHH, different methylation types; TR, tandem repeats; TE, transposon elements.

**(J)** Jujube-specific 163-kb MDHAR region (between dashed lines).

**(K)** MDHAR gene expression heatmap. There were 16 benchmarked tissues, 15 reported by Liu et al. (2014) and one “seedling” from this work.

Meng Yang<sup>1,4,\*</sup>, Lu Han<sup>1,4</sup>, Shufeng Zhang<sup>1</sup>,  
Li Dai<sup>1,2</sup>, Bin Li<sup>1</sup>, Shoukun Han<sup>1</sup>, Jin Zhao<sup>3</sup>,  
Ping Liu<sup>1,2</sup>, Zhihui Zhao<sup>1,2</sup> and Mengjun Liu<sup>1,2,\*</sup>

<sup>1</sup>College of Horticulture, Hebei Agricultural University, Baoding, Hebei 071001, China

<sup>2</sup>Research Center of Chinese Jujube, Hebei Agricultural University, Baoding, Hebei 071001, China

<sup>3</sup>College of Life Sciences, Hebei Agricultural University, Baoding, Hebei 071001, China

<sup>4</sup>These authors contributed equally to this article.

\*Correspondence: Meng Yang ([yangm@hebau.edu.cn](mailto:yangm@hebau.edu.cn)), Mengjun Liu ([kjliu@hebau.edu.cn](mailto:kjliu@hebau.edu.cn))

<https://doi.org/10.1016/j.xplc.2023.100662>

## REFERENCES

- Huang, J., Zhang, C., Zhao, X., Fei, Z., Wan, K., Zhang, Z., Pang, X., Yin, X., Bai, Y., Sun, X., et al. (2016). The jujube genome provides insights into genome evolution and the domestication of sweetness/ acidity taste in fruit trees. *PLoS Genet.* **12**:e1006433.
- Li, M., Ma, F., Liang, D., Li, J., and Wang, Y. (2010). Ascorbate biosynthesis during early fruit development is the main reason for its accumulation in kiwi. *PLoS One* **5**:e14281.
- Liu, M.J., Zhao, J., Cai, Q.L., Liu, G.C., Wang, J.R., Zhao, Z.H., Liu, P., Dai, L., Yan, G., Wang, W.J., et al. (2014). The complex jujube genome provides insights into fruit tree biology. *Nat. Commun.* **5**:5315.
- Liu, C., Cheng, Y.J., Wang, J.W., and Weigel, D. (2017). Prominent topologically associated domains differentiate global chromatin packing in rice from Arabidopsis. *Nat. Plants* **3**:742–748.
- Shen, L.Y., Luo, H., Wang, X.L., Wang, X.M., Qiu, X.J., Liu, H., Zhou, S.S., Jia, K.H., Nie, S., Bao, Y.T., et al. (2021). Chromosome-scale genome assembly for Chinese sour jujube and insights into its genome evolution and domestication signature. *Front. Plant Sci.* **12**:773090.
- Tuskan, G.A., Difazio, S., Jansson, S., Bohlmann, J., Grigoriev, I., Hellsten, U., Putnam, N., Ralph, S., Rombauts, S., Salamov, A., et al. (2006). The genome of black cottonwood, *Populus trichocarpa* (Torr. & Gray). *Science* **313**:1596–1604.

**Plant Communications, Volume 4**

**Supplemental information**

**Insights into the evolution and spatial chromosome architecture of jujube from an updated gapless genome assembly**

**Meng Yang, Lu Han, Shufeng Zhang, Li Dai, Bin Li, Shoukun Han, Jin Zhao, Ping Liu, Zhihui Zhao, and Mengjun Liu**

# Supplemental Information

## Part 1. Supplemental results

### 1.1 Telomere to Telomere (T2T) gapless assembly of Jujube genome

The jujube genome was completely karyotyped and sequenced in this study with the tissue-cultured seedlings (Figure A1). Using the 50.7 Gb ONT ultra-long pass reads, we first preliminary assembled the genome to 65 clean contigs without microbial and organelle sequences (N50 26.3 Mb). The 65 ONT contigs, with the Hi-C data, were integrated into a 411,141,465 bp assembly with 12 anchored chromosomes and 28 singleton contigs, which account for 95.2% and 4.8% of total sequences, respectively (Figure A2). We then assembled the genome using 28.6 Gb (71×) Pacbio HiFi ccs reads with Hifiasm software and took the primary contigs, representing the complete assembly with long stretches of phased blocks, from the assembly results for further analysis. The assembly results contained a total of 83 raw primary contigs, in which 10 (12.5 Mb) and eight (1.2 Mb) were contaminations from microorganisms and organelles, respectively; after removing them, 65 contigs remained with an N50 size of 30.4 Mb. Out of the 65 contigs, 18 large ones perfectly aligned to the ONT-based assemblies (Figure A3), and after comparison, all potential gaps among the 18 contigs were filled by the ONT assembly to generate 12 telomere-to-telomere (T2T) gapless contigs, representing 12 chromosomes of jujube genome. The 12 chromosomes were further validated by Hi-C data (Figure A4) and the genetic map previously reported (Liu et al. 2014) (Figure A5). All of the remaining 47 unanchored contigs were found to be duplicated repeats, and they were covered by the 12 chromosomes (Table A1). Consequently, these contigs were excluded from the final assembly. The final assembled size is 393,332,932 bp, with an N50 length of 32.99 Mb, including 12 T2T gapless chromosomes.

We validated the completeness of the genome using BUSCO with 98.5% conserved proteins entirely detected. In continuity, 94.37% of NGS reads, 97.76% of HiFi ccs reads and 98.40% of ONT corrected reads were mapped, covering 99.45%, 99.98%,

and 99.44% of the genome size, respectively (Table A2). Except for the two ends of each contig, which cannot be mapped by the algorithm, all other genome regions can be continually spanned through a combination of raw sequencing read from HiFi, ONT, and NGS. Finally, the SNPs and Indels from NGS short-reads helped estimate the base accuracy of the genome to be 99.998% (Table A3).

We further measured the genome assembly using the standards recommended by the Earth Biogenome Project (EBP) (<https://www.earthbiogenome.org/assembly-standards>) (Table A4). In all involved items, except the k-mer completeness, all other items reach the standard of the finished genome. The k-mer completeness were 85.11% for HiFi ccs reads, and this may due to the contamination reads, organelle reads and low-frequency reads that were discarded in the final assembly or not considered when assembling the genome. The related output data has been restored in the online share database at <https://figshare.com/s/56c2299b47a5efd8708f>.

The quality of this current assembly has substantially improved over the previous assembly based on NGS data (Liu et al. 2014), with a reduction of 410 folds in the number of contigs and an increase of about 6% in BUSCO completeness. The collinearity of the 12 chromosomes was generally consistent between the two versions of the genomes, however, chromosome four of the NGS assembly presented a large inversion error (Figure A6).

## **1.2. Taxonomic relationship between jujube and wild sour jujube.**

It is generally accepted that jujube evolved from wild sour jujube; however, they are not wholly independent in phylogeny, as the semi-wild sour jujube (as a transitional type) is now widely distributed (Liu et al. 2020; Huang et al. 2016). Therefore, the taxonomic relationship between jujube and wild sour jujube regarding whether they belong to the same species has been extensively discussed. Some studies supported that they are two different species with scientific names as *Ziziphus spinosa* Hu (Tang and Eisenbrand 1992; Zhao et al. 2022) and *Ziziphus acidojujuba* Liu et Cheng (Liu et

al. 2020); whereas others supported that they are the same species with scientific names as *Ziziphus jujuba* var. *spinosa* (Wu et al. 2022; Hua et al. 2022). The World Flora Online attributed the scientific name to *Ziziphus jujuba* var. *spinosa* (Bunge) Hu ex H.F.Chow, which considered sour jujube as an infraspecific taxon of the species *Ziziphus jujuba* Mill. (WFO 2023).

The Ks and 4DTv analysis based on the genomic collinear region in pairwise comparison ('Dongzao' – 'Junzao', 'Dongzao' – 'Suanzao', and 'Junzao' – 'Suanzao') revealed that the values of all three peaks representing the speciation events are nearly the same and all close to the y-axis, which represented their close relationship. To make a comparison, we assembled the draft genome of *Ziziphus mauritiana* (The draft Genome has been deposited in the National Genomics Data Center under BioProject PRJCA016173), which is in the same genus as *Ziziphus* but different species from jujube. The peaks of Ks and 4DTv generated by the orthologous genes between *Z. mauritiana* and *Ziziphus jujuba* Mill. 'Dongzao' appeared to be more complete and occurred earlier than those of three jujube genotypes (Figure A7), supporting the conception that jujubes and wild jujubes belong to the same species.

## Additional Tables for Part 1.

Table A1. Outputs of Purge\_dups Software.

|          |            |            |        |       |
|----------|------------|------------|--------|-------|
| Chr04    | 28,590,891 | 28,624,008 | OVLP   | Chr01 |
| Chr06    | 12,989,326 | 13,006,670 | OVLP   | Chr03 |
| Chr07    | 24,197,410 | 24,224,351 | OVLP   | Chr02 |
| Chr08    | 3,909,118  | 3,966,478  | OVLP   | Chr04 |
| Chr08    | 44,370     | 230,797    | OVLP   | Chr07 |
| Chr10    | 14,050,633 | 14,095,740 | OVLP   | Chr01 |
| Chr10    | 19,590,421 | 19,615,719 | OVLP   | Chr09 |
| Chr10    | 20,711,693 | 20,729,789 | OVLP   | Chr04 |
| Chr11    | 19,320,147 | 19,338,632 | OVLP   | Chr06 |
| Chr11    | 2,592,892  | 2,782,789  | OVLP   | Chr10 |
| Chr11    | 3,304,817  | 3,379,353  | OVLP   | Chr06 |
| Contig01 | 0          | 1,712,805  | REPEAT | Chr07 |
| Contig02 | 0          | 1,045,995  | REPEAT | Chr07 |
| Contig03 | 0          | 742,939    | REPEAT | Chr07 |
| Contig04 | 0          | 522,229    | REPEAT | Chr08 |
| Contig05 | 0          | 518,913    | REPEAT | Chr07 |



|          |   |         |        |       |
|----------|---|---------|--------|-------|
| Contig06 | 0 | 345,652 | REPEAT | Chr07 |
| Contig07 | 0 | 326,366 | REPEAT | Chr07 |
| Contig08 | 0 | 300,273 | REPEAT | Chr07 |
| Contig09 | 0 | 266,395 | REPEAT | Chr08 |
| Contig10 | 0 | 238,774 | REPEAT | Chr07 |
| Contig11 | 0 | 193,878 | REPEAT | Chr07 |
| Contig12 | 0 | 181,665 | REPEAT | Chr07 |
| Contig13 | 0 | 166,833 | REPEAT | Chr07 |
| Contig14 | 0 | 164,191 | REPEAT | Chr07 |
| Contig15 | 0 | 162,000 | REPEAT | Chr07 |
| Contig16 | 0 | 139,146 | REPEAT | Chr08 |
| Contig17 | 0 | 133,196 | REPEAT | Chr07 |
| Contig18 | 0 | 132,357 | REPEAT | Chr08 |
| Contig19 | 0 | 118,076 | REPEAT | Chr07 |
| Contig20 | 0 | 114,639 | REPEAT | Chr07 |
| Contig21 | 0 | 113,031 | REPEAT | Chr07 |
| Contig22 | 0 | 111,589 | REPEAT | Chr07 |
| Contig23 | 0 | 111,542 | REPEAT | Chr08 |
| Contig24 | 0 | 110,135 | REPEAT | Chr07 |
| Contig25 | 0 | 104,018 | REPEAT | Chr07 |
| Contig26 | 0 | 94,367  | REPEAT | Chr07 |
| Contig27 | 0 | 91,541  | REPEAT | Chr07 |
| Contig28 | 0 | 69,405  | REPEAT | Chr08 |
| Contig29 | 0 | 67,775  | REPEAT | Chr07 |
| Contig30 | 0 | 62,946  | REPEAT | Chr08 |
| Contig31 | 0 | 57,407  | REPEAT | Chr07 |
| Contig32 | 0 | 57,020  | REPEAT | Chr07 |
| Contig33 | 0 | 56,519  | REPEAT | Chr07 |
| Contig34 | 0 | 56,462  | REPEAT | Chr07 |
| Contig35 | 0 | 54,660  | REPEAT | Chr07 |
| Contig36 | 0 | 50,598  | REPEAT | Chr12 |
| Contig37 | 0 | 45,514  | REPEAT | Chr06 |
| Contig38 | 0 | 41,467  | REPEAT | Chr07 |
| Contig39 | 0 | 40,313  | REPEAT | Chr08 |
| Contig40 | 0 | 40,312  | REPEAT | Chr07 |
| Contig41 | 0 | 38,695  | REPEAT | Chr08 |
| Contig42 | 0 | 38,080  | REPEAT | Chr07 |
| Contig43 | 0 | 37,710  | REPEAT | Chr08 |
| Contig44 | 0 | 36,009  | REPEAT | Chr08 |
| Contig45 | 1 | 30,088  | JUNK   |       |
| Contig46 | 0 | 27,755  | REPEAT | Chr08 |
| Contig47 | 0 | 21,885  | REPEAT | Chr07 |

---

Table A2. Reads mapping statistics to contig assembly.

| Platform | Total Reads | Map Reads   | Map Rate | Covered genome |
|----------|-------------|-------------|----------|----------------|
| MGI-SEQ  | 147,060,360 | 138,776,269 | 94.37%   | 99.45%         |
| HiFi     | 1,631,748   | 1,595,120   | 97.76%   | 99.98%         |
| ONT      | 94,304      | 92,793      | 98.40%   | 99.44%         |

Table A3. Genome accuracy evaluation by NGS reads.

| Depth      | Hetero SNP | Hetero Indel | Homo SNP | Error rate by Homo SNP(%) | Homo Indel | Error rate by Homo Indel(%) | Error rate by homo variants(%) | Accuracy genome(%) |
|------------|------------|--------------|----------|---------------------------|------------|-----------------------------|--------------------------------|--------------------|
| depth>=1x  | 2,277,973  | 326,926      | 5,100    | 0.001211                  | 9,650      | 0.002292                    | 0.003503                       | 99.996497          |
| depth>=5x  | 2,277,611  | 326,209      | 3,694    | 0.000877                  | 8,002      | 0.0019                      | 0.002778                       | 99.997222          |
| depth>=10x | 2,274,785  | 321,582      | 2,578    | 0.000612                  | 5,616      | 0.001334                    | 0.001946                       | 99.998054          |

Table A4. Assembly evaluation using the recommended approaches by EBP.

| Quality Category        | Quality Metric         | Value                 | Standard | Software used        |
|-------------------------|------------------------|-----------------------|----------|----------------------|
| Continuity              | Contig (NG50)          | 32.99 Mb              | Finished | In house scripts     |
|                         | Scaffolds (NG50)       | 32.99 Mb              | Finished |                      |
|                         | Gaps/Gbp               | 0%                    | Finished |                      |
| Structural accuracy     | False duplication      | 0%                    | Finished | Purge_Dups and Asset |
|                         | Reliable blocks        | 32.99 Mb              | Finished |                      |
|                         | Curation improvements  | All conflict resolved | Finished |                      |
| Base Accuracy           | Base pair QV           | 64                    | Finished | Mercury              |
|                         | k-mer completeness     | 85.11%                | 4.5.Q30  |                      |
| Functional completeness | Genes                  | 98.50%                | Finished | BUSCO                |
|                         | Transcript mappability | 100%                  | Finished | STAR and samtools    |
| Chromosome status       | % Assigned             | 100%                  | Finished | In house scripts     |
|                         | Organelles             | Complete              | Finished |                      |

**Additional Figures for Part 1.**

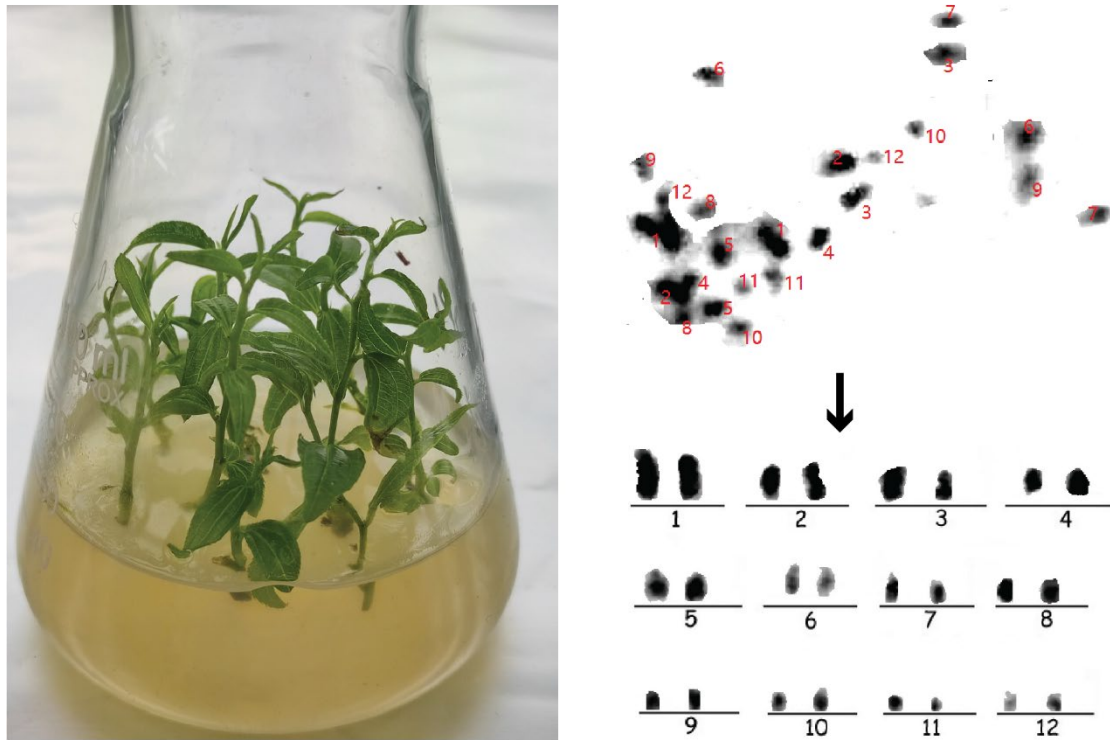

Figure A1. Tissue-cultured sample of 'Dongzao' jujube and karyogram for 12 chromosomes.

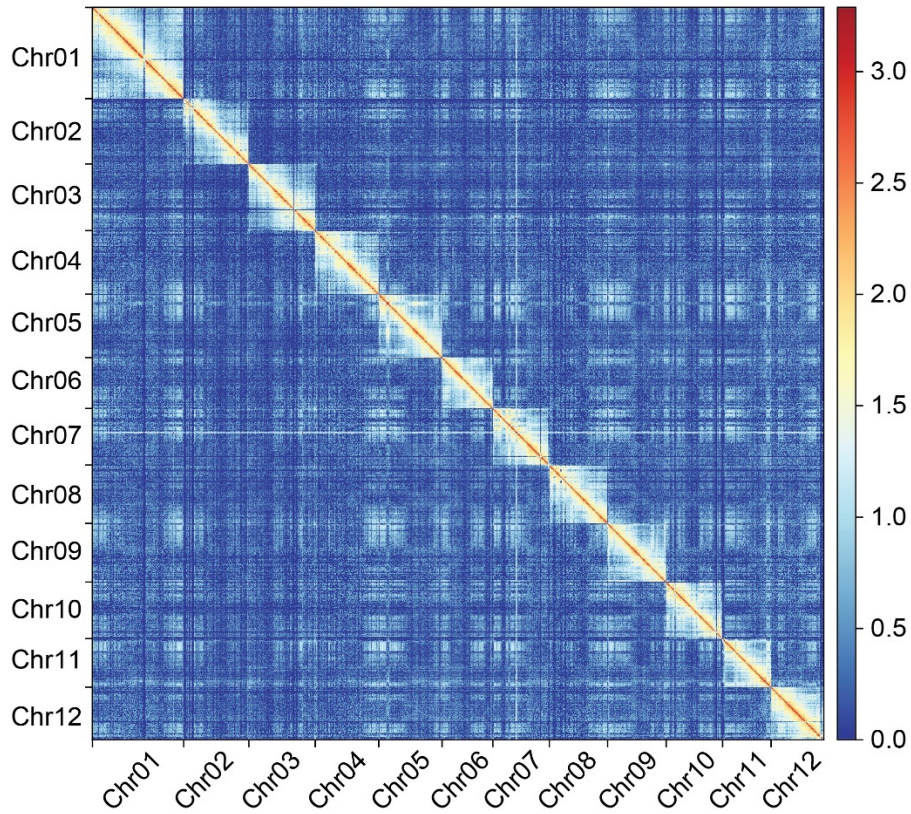

Figure A2. Hi-C chromatin interaction map for the ONT assembly in 100 kb resolution.

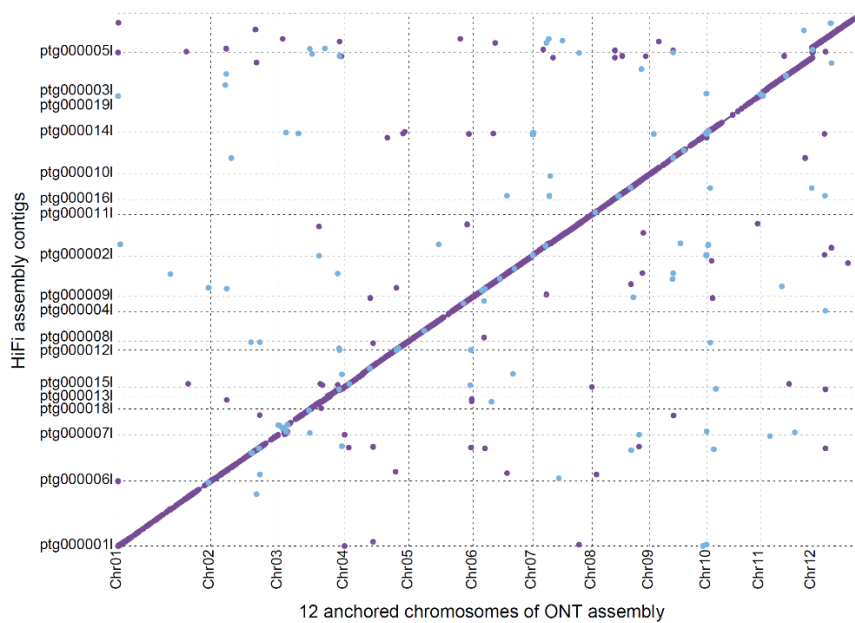

Figure A3. Mummer plot between ONT-based assembly and HiFi-based contigs. The x-axis represents 12 Hi-C-anchored chromosomes of ONT assembly, and the y-axis represents the 18 optimally aligned HiFi contigs.

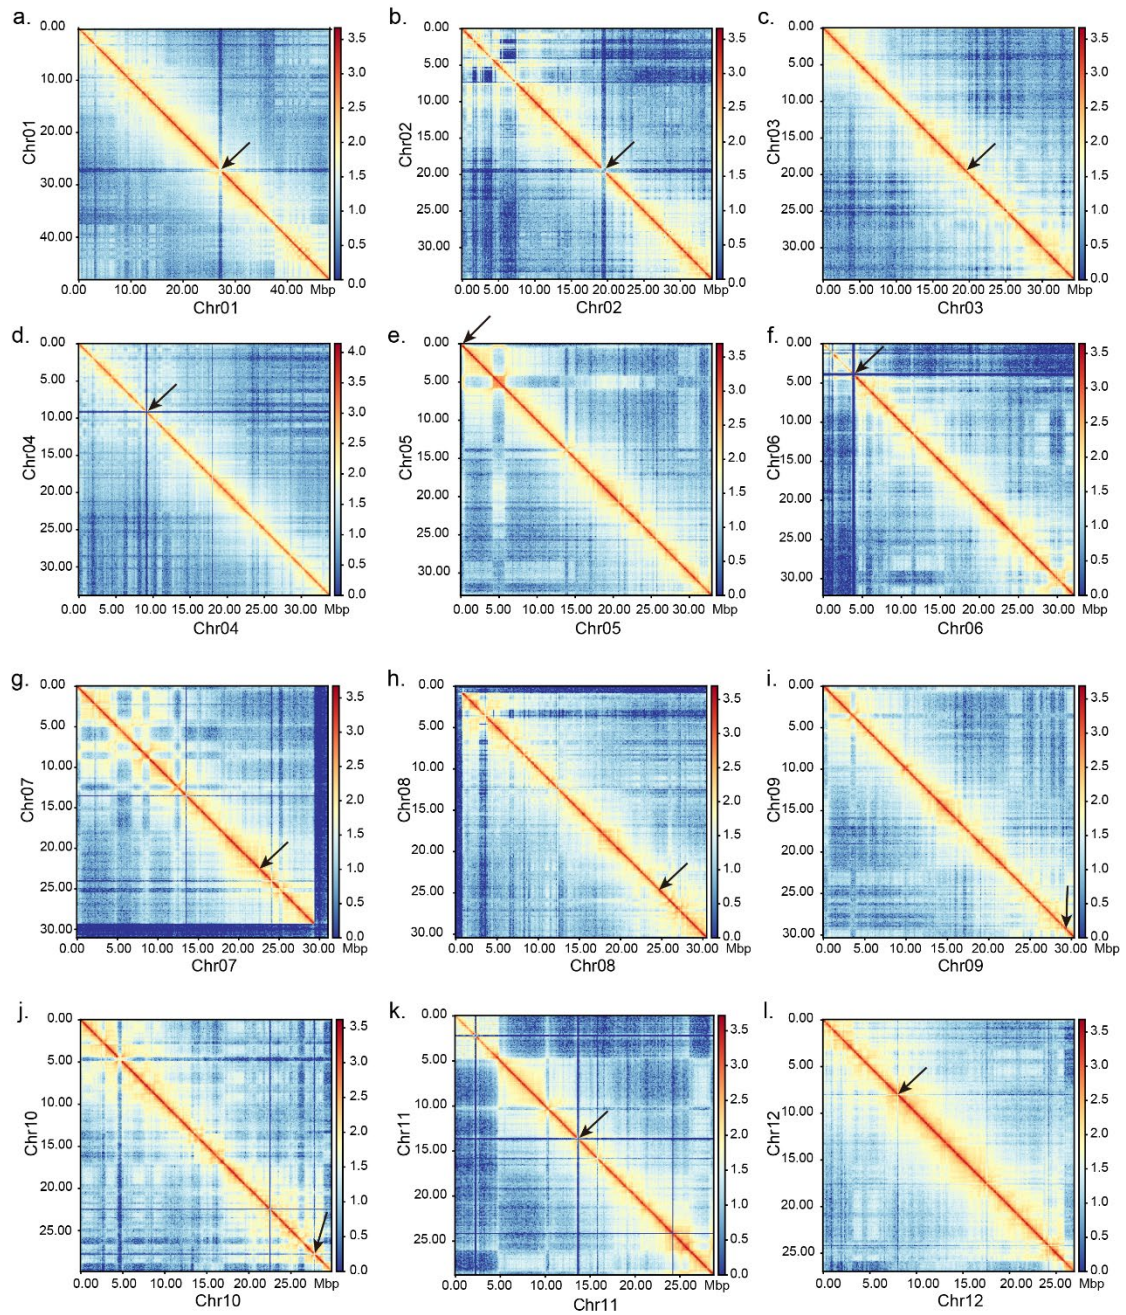

Figure A4. Hi-C intra-chromatin interaction map of the final HiFi assembly in 100 kb resolution. The black arrows represent the putative position of centromeres.

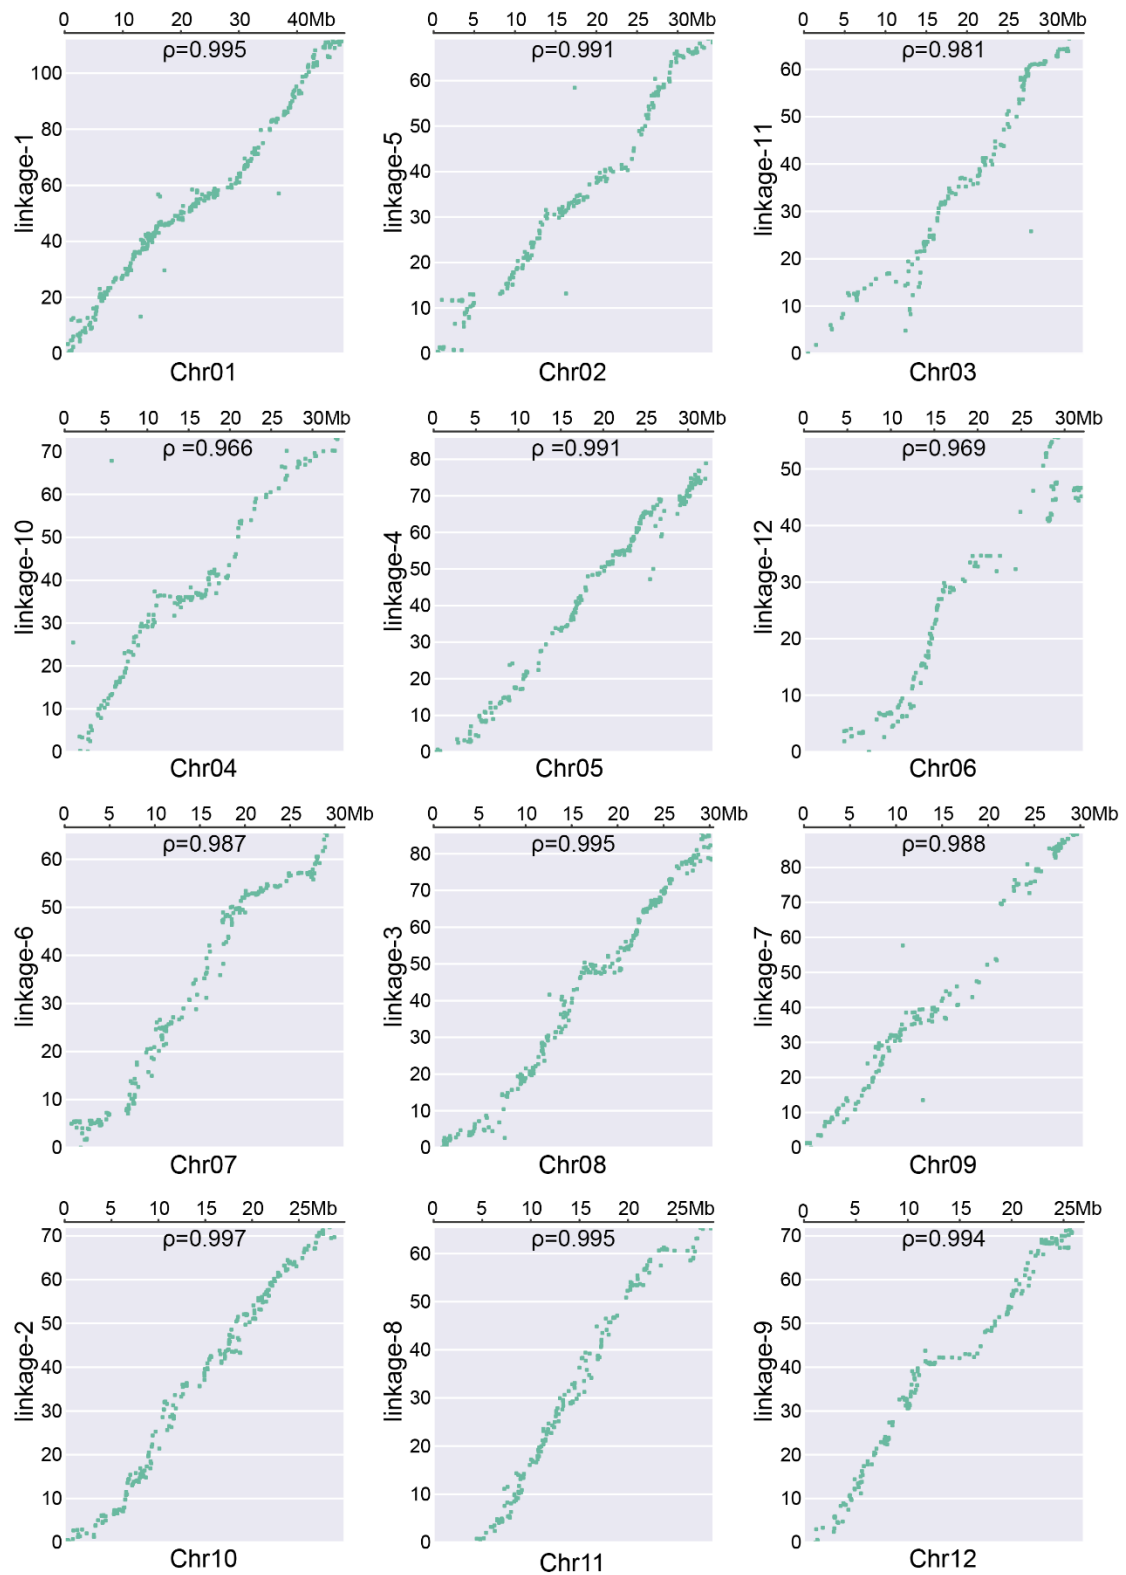

Figure A5. Collinearity between the jujube high-density genetic map and the corresponding chromosome assembly.

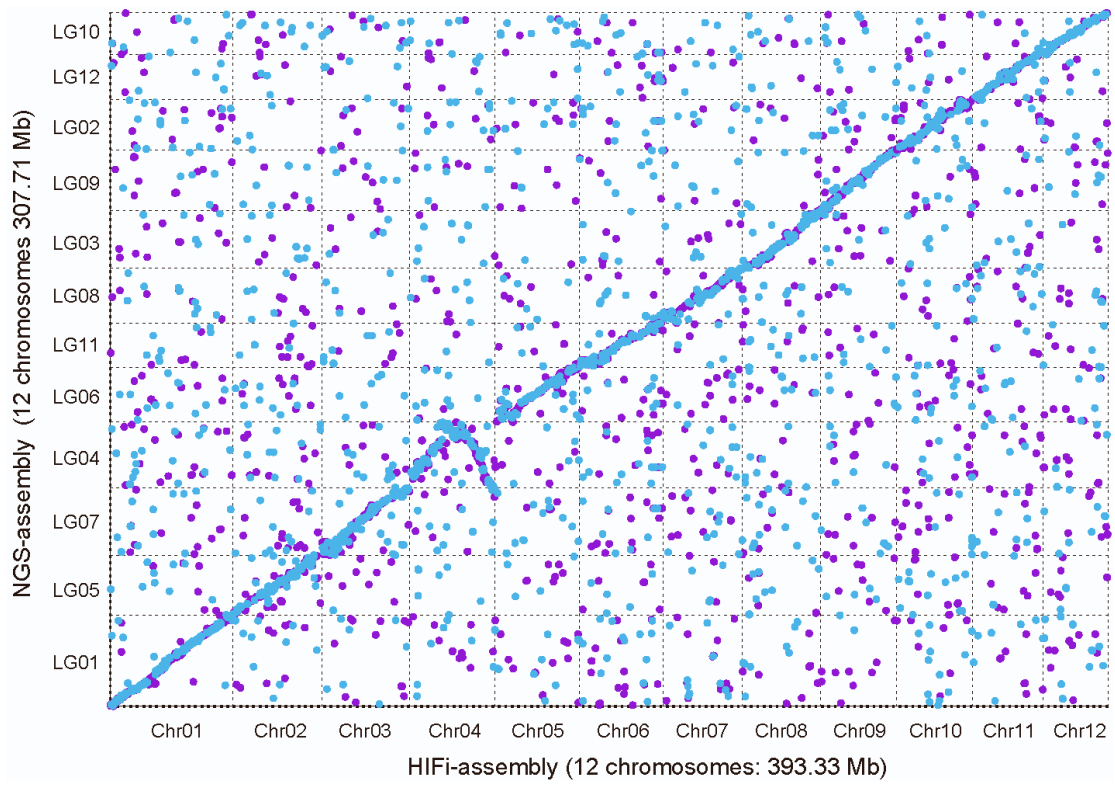

Figure A6. Genome-wide collinear comparison of HiFi assembly and the NGS assembly of *Ziziphus jujuba* Mill. 'Dongzao' by using Mummer software. Only the best hits were kept in the plot.

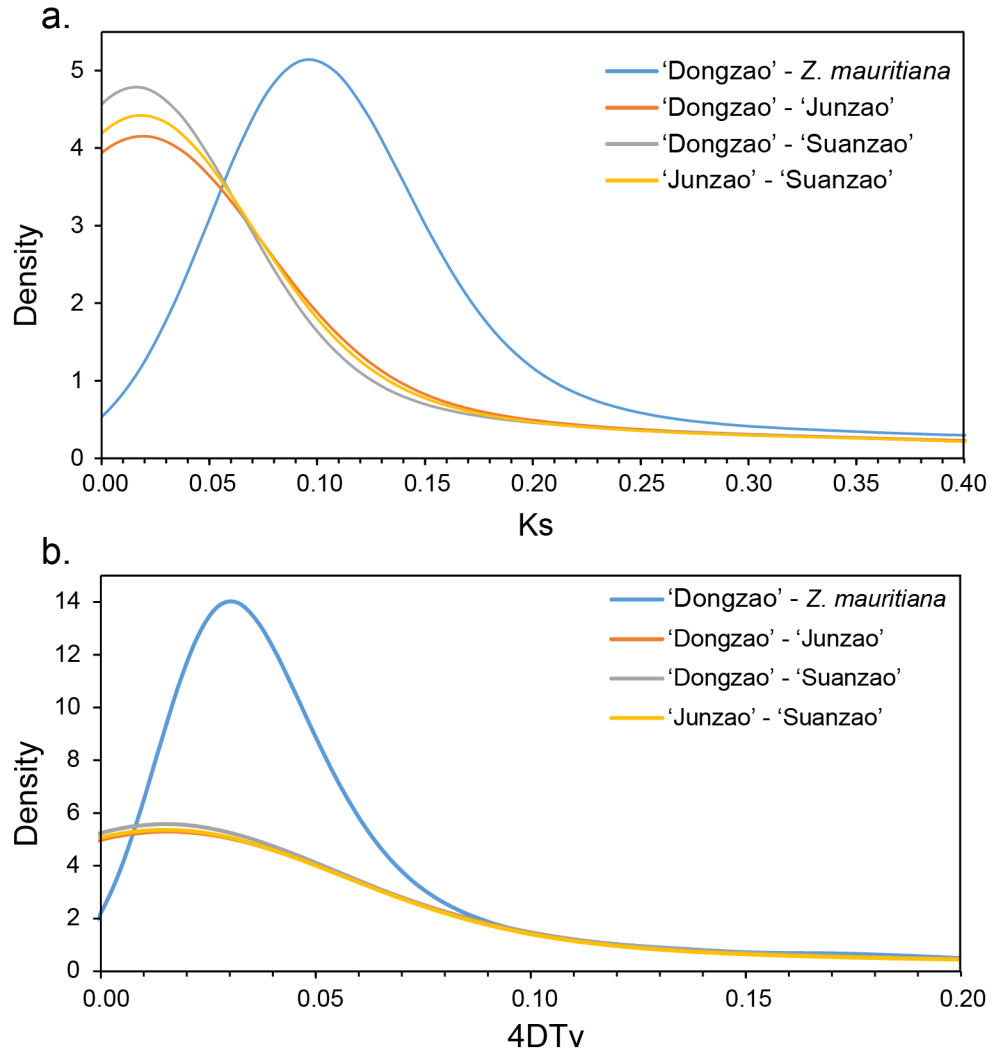

Figure A7. Speciation event based on Ks and 4DTv among three jujube genotypes as well as between 'Dongzao' and *Ziziphus mauritiana*. (a) Ks; (b) 4DTv.



## **Part 2. Materials and methods**

### **2.1 Sample and karyotype**

Young seedlings were obtained from the two-month *Z. jujuba* Mill. 'Dongzao' tissue culture plantlets were cultured at 25°C. To observe and confirm the karyotype of chromosomes, the stem apex of the tissue culture plantlet was pretreated with 0.7 mM colchicine at an average room temperature of 25°C for 12 h, washed with distilled water, immersed in 0.075 mol/L hypotonic KCl solution at 4°C for 1 h, and then transferred to Carnot fixator for 12 h. Subsequently, the fixed stem apex was thoroughly cleaned with distilled water and stained with carbol fuchsin. Finally, we transferred the dyed and softened materials to a glass slide and observed the karyotype under an oil microscope (Olympus BX51TF).

### **2.2 Short-read sequencing and quality control**

Using the modified cetyltrimethylammonium bromide (CTAB) technique, total genomic DNA was isolated (Murray and Thompson 1980). The DNA purity was evaluated with a NanoDrop™ One UV-Vis spectrophotometer (Thermo Fisher Scientific, USA), and the DNA integrity was confirmed by agarose gel electrophoresis. The DNA was utilized to generate a paired-end library with an insert size of 200-400 bp on the MGISEQ-2000 technology (BGI, Shenzhen, Guangdong, China). These short reads were created to assess the genome's size and heterozygosity and to correct the Long-reads' preliminary assembly of the genome. Raw readings were filtered by the fastp (v.0.20.0) preprocessor with default parameters to remove low-quality reads, adapters, and poly-N-containing reads before quality control (Chen et al. 2018). The following criteria were applied to discard reads: (1) 10% unidentified nucleotides (N); (2) > 10 nucleotides aligned to the adaptor; (3) the length of bases with Phred quality of 5 in a read longer than >50% of the read length; and (4) with PCR duplicated reads (read 1 and read 2 of two paired-end reads are completely identical). To confirm the absence of contamination, 100,000 random readings were compared to the NCBI nt database.

In addition, a Hi-C library was constructed and sequenced to facilitate chromosome-level genome assembly. Approximately 2 g of fresh leaves were utilized for library construction, and the technique involved formalin fixation, crosslinking, nuclei suspension, digestion, DNA ligation, end-repair, purification, and quantification, as previously described (Belton et al. 2012). The qualifying library was subsequently sequenced on an MGI-2000 platform. The quality control measures were identical to those described above for paired-end sequencing.

### **2.3 Genome size and heterozygosity Estimation**

KMC software (Kokot et al. 2017) was used to generate the k-mer counts (k=21) from the cleaned short reads, and GenomeScope2 software (Ranallo-Benavidez et al. 2020) subsequently used these k-mers to estimate the genome size and heterozygosity.

### **2.4 Long reads sequencing by Pacbio HiFi and Oxford Nanopore**

To prepare DNA for the long-read sequencing, high molecular weight genomic DNA was extracted using the SDS technique and purified using the QIAGEN® Genomic kit (Cat#13343, QIAGEN). On 1% agarose gels, the level of DNA degradation and contamination was evaluated. Using a NanoDrop™ One UV-Vis spectrophotometer (Thermo Fisher Scientific, USA), the OD 260/280 and 260/230 ranges were determined to be between 1.8 and 2.0 and 2.0 and 2.2, respectively.

Pacbio HiFi SMRTbell libraries were constructed following the standard protocol using the SMRTbell Express Template Prep Kit 2.0 (PacBio, CA, USA). The lengthy DNA fragments were skillfully sheared down to 15-18 kb using a g-TUBE (Covaris, MA, USA). Single-strand overhangs were cut off and damaged and broken DNA was patched up with the chemicals in the Template Prep Kit. Once the ends were fixed, SMRTbell hairpin adapters were ligated to them, and then the libraries were concentrated and purified using AMPure PB beads (PacBio, CA, USA). BluePippin was utilized to size-select SMRTbell templates more than 15 kb to get large-insert SMRTbell libraries for sequencing (SageScience, MA, USA). The sequencing was performed using a PacBio Sequel II device with Sequencing Primer V2 and a Sequel

II Binding Kit 2.0. For the raw sequencing reads, the min passes = 3 and min RQ = 0.99 default parameters in CCS software (<https://github.com/PacificBiosciences/ccs>) were utilized to generate high-precision HiFi reads with quality over Q20.

For ONT sequencing, the NEBNext Ultra II End Repair/dA-tailing Kit was used to fix the ends of the lengthy DNA fragments that were size-selected with the BluePippin system (Sage Science, USA) (Catalog number E7546). The fragment size of the library was then measured with a Qubit® 3.0 Fluorometer after a second ligation reaction was performed with an LSK109 kit (Invitrogen, USA). Library sequencing was performed on Nanopore PromethION instruments (ONT: Oxford Nanopore Technologies, UK). The raw information is presented as FAST5 binary signal data. We utilized a high-precision flip-flop model with the guppy basecaller command in the GPU-enabled Guppy program (v3.4.4) to collect the fastq data. Reads with Q scores greater than 7 were considered passed after the raw data in fastq format had been analyzed for base quality.

## **2.5 Genome assembly and evaluation**

The ONT and HiFi sequencing reads were initially utilized to create ONT-based and Hifi-based assemblies, respectively. To generate the ONT-based assembly, the ONT passed reads were *de novo* assembled using NextDenovo (V2.3.1). Subsequently, the assembly was refined with the ONT-passed long reads using Racon (Vaser et al. 2017) and curated using the paired-end short reads with Nextpolish (Hu et al. 2020). Contaminations including microbial and organelle sequences were removed by aligning to the NCBI nt database. The cleaned Hi-C reads were then used to anchor the ONT contigs into chromosomes. First, unique mapped reads were recognized with bowtie2 (v2.3.2) (Langmead and Salzberg 2012), followed by the identification of paired reads with valid interaction using HiC-Pro (v2.8.1) (Servant et al. 2015). These valid pairs of reads were next applied to build the pseudo-chromosome sequences by LACHESIS (Burton et al. 2013), with the following key parameters:

CLUSTER\_MIN\_RE\_SITES=100

CLUSTER\_MAX\_LINK\_DENSITY=2.5

CLUSTER\_NONINFORMATIVE\_RATIO = 1.4

ORDER\_MIN\_N\_RES\_IN\_TRUNK=60

ORDER\_MIN\_N\_RES\_IN\_SHREDS=60

The whole process involves clustering, ordering, and orientation according to the interaction relationship of Hi-C reads, accompany by the manual operation to adjust the position and orientation of discrete contigs based on the chromatin interaction patterns. Finally, all positioned contigs were linked by 100 bp Ns to generate the pseudo-chromosomes.

The HiFi ccs readings were assembled with Hifiasm (v0.16.1-r375) (Cheng et al. 2021) using the default parameters to construct the Hifi-based assembly. Because jujube is typically propagated vegetatively through grafting, and the parents are unavailable, properly assembling the genome into two haplotypes is difficult. So, for the following analysis, we chose Hifiasm's primary assembly, which is a complete assembly with extensive stretches of phased blocks (<https://lh3.github.io/2021/04/17/concepts-in-phased-assemblies>). The primary contigs were aligned with the NCBI nt database to exclude microbial and organelle contaminations. Using mummer (v4.0.0rc1) (Marcais et al. 2018), the cleaned primary contigs were then directed to the final telomere-to-telomere gapless assembly by comparison to the above ONT assembly.

The completeness of the jujube genome assembly was assessed using the embryophyta\_odb10 of BUSCO v4.0.5 (Simao et al. 2015). To evaluate the base accuracy, BWA (Li and Durbin 2010) and minimap2 (Li 2018) were used to respectively align the short paired-end reads and the long HiFi/ ONT reads to the assembled genome, and the results were interpreted by SAMtools (Li et al. 2009) for mapping rate, base accuracy, as well as genome coverage of the short reads.

## **2.6 RNA sequencing and data analysis**

RNA was collected from the same sample as DNA using a plant RNA isolation kit (Tiangen Biotechnology Co.). Following the manufacturer's instructions, sequencing

libraries were created using the TruSeq RNA Library Preparation Kit (Illumina, United States). Brief procedures include mRNA purification using oligo poly-T probes, cDNA synthesis, adaptor ligation, size selection and purification, PCR, PCR product purification, and library quality evaluation. Finally, the library was sequenced on an Illumina Novaseq platform to obtain 150 bp paired-end reads.

The raw paired-end RNA-seq reads were first performed for quality control using fastp (Chen et al. 2018). Then the clean reads were mapped to the jujube genome using STAR (v2.7.10) with the default parameters (Dobin and Gingeras 2015b). The result BAM file was used as the input to the RSEM software (Li and Dewey 2011) to calculate the expression level for each transcript using the fragments per kilobase of exon per million mapped reads (FPKM).

## **2.7 PacBio full-length cDNA sequencing**

Total RNA was extracted from the same sample containing DNA by grinding tissue using the CTAB-LiCl technique on dry ice. Agilent 2100 Bioanalyzer (Agilent Technologies) and agarose gel electrophoresis were used to assess the RNA's integrity. Only high-quality RNA (OD260/280: 1.82.2, OD260/230: 2.0, RIN: 8; quantity: >1 g) was utilized to create the sequencing library. Approximately 300 ng of RNA was reverse-transcribed into cDNA and amplified with the NEBNext® Single Cell/Low Input cDNA Synthesis & Amplification Module and Iso-Seq Express Oligo Kit. Using SMRTbell Express Template Prep Kit 2.0 (Pacific Biosciences), the library was produced by damage repair, end repair, A-tailing, and adapters ligation. Finally, the SMRTbell template was annealed to the sequencing primer, bound to polymerase, and sequenced using Sequel II Binding Kit 2.0 on the PacBio Sequel II platform (Pacific Biosciences).

## **2.8 Genome annotation**

The interspersed repetitions were discovered using *ab initio* and homology-based methods. Briefly, an *ab initio* species-specific repeat library was prepared using RepeatModeler (Price et al. 2005); this library and the Repbase database

(<http://www.girinst.org/repeatbase>) were used as the inputs to RepeatMasker software (Chen 2004) to search for repetitions at the whole genome-level. Subsequently, the entire long terminal repeat retrotransposons (LTR-RTs) were detected by LTR FINDER (Xu and Wang 2007) and *ltr\_harvester* (Ellinghaus et al. 2008), followed by the integration using *LTR\_retriver* (Ou and Jiang 2018), which included the search for false positives, terminal motifs, and transposon protein domains. Finally, the intact LTR insertion time was computed using the formula:

$$T=K/2\mu,$$

where K is the divergence rate estimated by the identity of LTRs using the baseml model of PAML, and  $\mu$  is the neutral mutation rate denoting mutations per bp per year, using a value of  $7.77 \times 10^{-9}$  as proposed in peaches (Xie et al. 2016).

The protein-coding genes were predicted by combining protein homology, transcriptome, and *ab initio* approach. The homologous proteins of related species, including *Malus domestica*, *Arabidopsis thaliana*, *P. trichocarpa*, *Prunus persica*, *Prunus armeniaca*, and *Pyrus pyrifolia*, were aligned using GeMoMa (Keilwagen et al. 2019). In transcriptome-based prediction, RNA-seq reads were mapped to the genome with STAR (Dobin and Gingeras 2015a), and the mapping information was passed to string tie (Pertea et al. 2015) to assemble the transcripts. Subsequently, the transcripts and full-length PacBio cDNA were imported to PASA (Haas et al. 2003) to obtain the prediction. *Ab initio* gene prediction was performed by importing the string tie transcripts to Augustus (Stanke et al. 2006) to generate a training set suited for the jujube genome using the default parameters. The final gene prediction was accomplished with EVIDENCEModeler (EVM) (Haas et al. 2008) by merging the prediction findings of the aforementioned approaches, followed by a comparison to the genome to eliminate genes wholly located in repetitive regions. The transposon genes were further filtered using the TransposonPSI software (<https://github.com/NBISweden/TransposonPSI>). Finally, the function of proteins was annotated using the Interproscan (v5.57-90.0) (Jones et al. 2014) as well as eggNOG-mapper (v2.1.6) (Cantalapiedra et al. 2021); the GO function and KEGG pathway

information were extracted from the former and the latter, respectively.

Homology search or *ab initio* prediction was also used to identify the non-coding RNAs (ncRNAs), including transfer RNAs (tRNAs), ribosomal RNAs (rRNAs), and microRNAs (miRNAs). The tRNAscan-SE program was used to identify tRNAs (Lowe and Eddy 1997). MiRNA and other non-coding RNAs were identified by searching the Rfam database with Infernal (<http://infernal.janelia.org>). The rRNAs and their subunits were predicted using the default parameters of RNAmmer (<https://github.com/tseemann/barrnap>).

## **2.9 Identification of telomeres and centromeres**

The telomere-specific motif “CCCTAAA” and “TTTAGGG” were used to locate the telomeres. Two approaches were adopted to identify the centromere sequences: (1) Tandem Repeats Finder (TRF) (Benson 1999) was utilized to identify the abundant top repeats, and the results with core repeat unit >50 bp and at least repeated 20 times were retained; (2) Using the method in *Arabidopsis*, wherein the periodic 12-mer in the 1-kb windows was identified from the genome assembly to determine the telomere sequences (Naish et al. 2021).

## **2.10 Whole-genome bisulfite sequencing**

Total genomic and control unmethylated lambda DNA were combined to a volume of 80 l using 1× TE buffer and fragmented to 300 bp. The dA-tailed fragment was ligated with methylated adaptors following end repair and dA-tailing. The ligated DNA was then treated with bisulfite and amplified using the uracil-binding pocket of KAPA HiFi DNA Polymerase. Finally, the library was quantified and sequenced as paired-end 150-bp reads on an Illumina HiSeq X10 sequencer (Illumina, Inc.). Raw sequencing data were curated by removing adaptor-polluted reads, low-quality reads, and reads with over 10% Ns. Subsequently, clean reads were mapped to the jujube genome using Bismark (V0.23.1) (Krueger and Andrews 2011), and only uniquely mapped reads were retained. Methylated cytosines were identified based on the binomial test followed by Benjamini–Hochberg false discovery rate correction.

## 2.11 Comparative genomics analysis

Genome collinear region was identified using the MCScanX (Wang et al. 2012) with e-value  $1e-05$ , and nonsynonymous and synonymous substitution rates (Ka and Ks) of collinearity genes were computed using KaKs\_Calculator with the NG module (Zhang et al. 2006). The fourfold synonymous third-codon transversion rates (4DTV) were calculated by using `calculate_4DTV_correction.pl` (<https://github.com/JinfengChen/Scripts/blob/master/FFgenome/03>.

`evolution/distance_kaks_4dtv/bin/calculate_4DTV_correction.pl`). The sequence similarity of paralogs was obtained from the pairwise alignment of paralogs using BLASTN.

## 2.12 3D chromosomes interaction analysis

Singleton-, multi-mapped-, and duplicated- reads were removed through HiC-Pro (v3.0.0) (Servant et al. 2015) and uniquely mapped reads were retained to generate the interaction matrix. Three bin sizes of 100 kb, 50 kb, and 10 kb from HiC-Pro were utilized to generate the contact matrix files for matrix plotting, A/B compartments, and TADs analysis. The Hi-C contact map was generated using HiCexplorer (v3.7.2) (Wolff et al. 2020) utilizing the 100 kb bin matrix file. To quantify the interactions between pairs of chromosomes (Figure 1f), the number (N) in each square lattice is  $N=1000*S/L$ , where S is the sum of all contacted reads pairs between two chromosomes, and L is the sum of the length of two chromosomes. Principal component analysis was performed on a 50 Kb matrix file, and the positive and negative values of the first eigenvector were used to define the A and B compartments, respectively, using Cworld (V0.0.1) (<https://github.com/dekkerlab/cworld-dekker>). TopDom (V0.0.2) (Shin et al. 2016) was applied to identify the TADs using the 10-Kb matrix file.



## Supplemental References

- Belton JM, McCord RP, Gibcus JH, Naumova N, Zhan Y, Dekker J (2012) Hi-C: a comprehensive technique to capture the conformation of genomes. *Methods* 58 (3):268-276
- Benson G (1999) Tandem repeats finder: a program to analyze DNA sequences. *Nucleic Acids Res* 27 (2):573-580
- Burton JN, Adey A, Patwardhan RP, Qiu R, Kitzman JO, Shendure J (2013) Chromosome-scale scaffolding of de novo genome assemblies based on chromatin interactions. *Nat Biotechnol* 31 (12):1119-1125
- Cantalapiedra CP, Hernández-Plaza A, Letunic I, Bork P, Huerta-Cepas J (2021) eggNOG-mapper v2: functional annotation, orthology assignments, and domain prediction at the metagenomic scale. *Molecular biology and evolution* 38 (12):5825-5829
- Chen N (2004) Using RepeatMasker to identify repetitive elements in genomic sequences. *Curr Protoc Bioinformatics* Chapter 4:Unit 4 10
- Chen S, Zhou Y, Chen Y, Gu J (2018) fastp: an ultra-fast all-in-one FASTQ preprocessor. *Bioinformatics* 34 (17):i884-i890
- Cheng H, Concepcion GT, Feng X, Zhang H, Li H (2021) Haplotype-resolved de novo assembly using phased assembly graphs with hifiasm. *Nature Methods* 18 (2):170-175
- Dobin A, Gingeras TR (2015a) Mapping RNA-seq Reads with STAR. *Curr Protoc Bioinformatics* 51:11 14 11-11 14 19
- Dobin A, Gingeras TR (2015b) Mapping RNA-seq reads with STAR. *Current protocols in bioinformatics* 51 (1):11.14. 11-11.14. 19
- Ellinghaus D, Kurtz S, Willhoeft U (2008) LTRharvest, an efficient and flexible software for de novo detection of LTR retrotransposons. *BMC Bioinformatics* 9:18
- Haas BJ, Delcher AL, Mount SM, Wortman JR, Smith RK, Jr., Hannick LI, Maiti R, Ronning CM, Rusch DB, Town CD, Salzberg SL, White O (2003) Improving the

- Arabidopsis genome annotation using maximal transcript alignment assemblies. *Nucleic Acids Res* 31 (19):5654-5666
- Haas BJ, Salzberg SL, Zhu W, Pertea M, Allen JE, Orvis J, White O, Buell CR, Wortman JR (2008) Automated eukaryotic gene structure annotation using EVIDENCEModeler and the Program to Assemble Spliced Alignments. *Genome Biology* 9 (1):R7
- Hu J, Fan J, Sun Z, Liu S (2020) NextPolish: a fast and efficient genome polishing tool for long-read assembly. *Bioinformatics* 36 (7):2253-2255
- Hua Y, Xu X-x, Guo S, Xie H, Yan H, Ma X-f, Niu Y, Duan J-A (2022) Wild Jujube (*Ziziphus jujuba* var. *spinosa*): A Review of Its Phytonutrients, Health Benefits, Metabolism, and Applications. *Journal of Agricultural and Food Chemistry* 70 (26):7871-7886
- Huang J, Zhang C, Zhao X, Fei Z, Wan K, Zhang Z, Pang X, Yin X, Bai Y, Sun X, Gao L, Li R, Zhang J, Li X (2016) The Jujube Genome Provides Insights into Genome Evolution and the Domestication of Sweetness/Acidity Taste in Fruit Trees. *PLoS genetics* 12 (12):e1006433
- Jones P, Binns D, Chang HY, Fraser M, Li W, McAnulla C, McWilliam H, Maslen J, Mitchell A, Nuka G, Pesseat S, Quinn AF, Sangrador-Vegas A, Scheremetjew M, Yong SY, Lopez R, Hunter S (2014) InterProScan 5: genome-scale protein function classification. *Bioinformatics* 30 (9):1236-1240
- Keilwagen J, Hartung F, Grau J (2019) GeMoMa: Homology-Based Gene Prediction Utilizing Intron Position Conservation and RNA-seq Data. *Methods Mol Biol* 1962:161-177
- Kokot M, Długosz M, Deorowicz S (2017) KMC 3: counting and manipulating k-mer statistics. *Bioinformatics* 33 (17):2759-2761
- Krueger F, Andrews SR (2011) Bismark: a flexible aligner and methylation caller for Bisulfite-Seq applications. *Bioinformatics* 27 (11):1571-1572
- Langmead B, Salzberg SL (2012) Fast gapped-read alignment with Bowtie 2. *Nat Methods* 9 (4):357-359

- Li B, Dewey CN (2011) RSEM: accurate transcript quantification from RNA-Seq data with or without a reference genome. *BMC bioinformatics* 12 (1):1-16
- Li H (2018) Minimap2: pairwise alignment for nucleotide sequences. *Bioinformatics* 34 (18):3094-3100
- Li H, Durbin R (2010) Fast and accurate long-read alignment with Burrows-Wheeler transform. *Bioinformatics* 26 (5):589-595
- Li H, Handsaker B, Wysoker A, Fennell T, Ruan J, Homer N, Marth G, Abecasis G, Durbin R, Genome Project Data Processing S (2009) The Sequence Alignment/Map format and SAMtools. *Bioinformatics* 25 (16):2078-2079
- Liu M, Wang J, Wang L, Liu P, Zhao J, Zhao Z, Yao S, Stanica F, Liu Z, Wang L, Ao C, Dai L, Li X, Zhao X, Jia C (2020) The historical and current research progress on jujube-a superfruit for the future. *Hortic Res* 7:119
- Liu MJ, Zhao J, Cai QL, Liu GC, Wang JR, Zhao ZH, Liu P, Dai L, Yan G, Wang WJ, Li XS, Chen Y, Sun YD, Liu ZG, Lin MJ, Xiao J, Chen YY, Li XF, Wu B, Ma Y, Jian JB, Yang W, Yuan Z, Sun XC, Wei YL, Yu LL, Zhang C, Liao SG, He RJ, Guang XM, Wang Z, Zhang YY, Luo LH (2014) The complex jujube genome provides insights into fruit tree biology. *Nat Commun* 5:5315
- Lowe TM, Eddy SR (1997) tRNAscan-SE: a program for improved detection of transfer RNA genes in genomic sequence. *Nucleic Acids Res* 25 (5):955-964
- Marcais G, Delcher AL, Phillippy AM, Coston R, Salzberg SL, Zimin A (2018) MUMmer4: A fast and versatile genome alignment system. *PLoS Comput Biol* 14 (1):e1005944
- Murray MG, Thompson WF (1980) Rapid isolation of high molecular weight plant DNA. *Nucleic Acids Res* 8 (19):4321-4325
- Naish M, Alonge M, Wlodzimierz P, Tock AJ, Abramson BW, Schmucker A, Mandakova T, Jamge B, Lambing C, Kuo P, Yelina N, Hartwick N, Colt K, Smith LM, Ton J, Kakutani T, Martienssen RA, Schneeberger K, Lysak MA, Berger F, Bousios A, Michael TP, Schatz MC, Henderson IR (2021) The genetic and epigenetic landscape of the Arabidopsis centromeres. *Science* 374 (6569):eabi7489

- Ou S, Jiang N (2018) LTR\_retriever: A Highly Accurate and Sensitive Program for Identification of Long Terminal Repeat Retrotransposons. *Plant Physiol* 176 (2):1410-1422
- Pertea M, Pertea GM, Antonescu CM, Chang T-C, Mendell JT, Salzberg SL (2015) StringTie enables improved reconstruction of a transcriptome from RNA-seq reads. *Nature Biotechnology* 33 (3):290-295
- Price AL, Jones NC, Pevzner PA (2005) De novo identification of repeat families in large genomes. *Bioinformatics* 21 Suppl 1:i351-358
- Ranallo-Benavidez TR, Jaron KS, Schatz MC (2020) GenomeScope 2.0 and Smudgeplot for reference-free profiling of polyploid genomes. *Nature Communications* 11 (1):1432
- Servant N, Varoquaux N, Lajoie BR, Viara E, Chen CJ, Vert JP, Heard E, Dekker J, Barillot E (2015) HiC-Pro: an optimized and flexible pipeline for Hi-C data processing. *Genome Biol* 16:259
- Shin H, Shi Y, Dai C, Tjong H, Gong K, Alber F, Zhou XJ (2016) TopDom: an efficient and deterministic method for identifying topological domains in genomes. *Nucleic acids research* 44 (7):e70-e70
- Simao FA, Waterhouse RM, Ioannidis P, Kriventseva EV, Zdobnov EM (2015) BUSCO: assessing genome assembly and annotation completeness with single-copy orthologs. *Bioinformatics* 31 (19):3210-3212
- Stanke M, Keller O, Gunduz I, Hayes A, Waack S, Morgenstern B (2006) AUGUSTUS: ab initio prediction of alternative transcripts. *Nucleic Acids Res* 34 (Web Server issue):W435-439
- Tang W, Eisenbrand G (1992) *Ziziphus jujuba* Mill. and *Z. spinosa* Hu. In: Tang W, Eisenbrand G (eds) *Chinese Drugs of Plant Origin: Chemistry, Pharmacology, and Use in Traditional and Modern Medicine*. Springer Berlin Heidelberg, Berlin, Heidelberg, pp 1017-1024. doi:10.1007/978-3-642-73739-8\_124
- Vaser R, Sovic I, Nagarajan N, Sikic M (2017) Fast and accurate de novo genome assembly from long uncorrected reads. *Genome Res* 27 (5):737-746

- Wang Y, Tang H, DeBarry JD, Tan X, Li J, Wang X, Lee T-h, Jin H, Marler B, Guo H (2012) MCSscanX: a toolkit for detection and evolutionary analysis of gene synteny and collinearity. *Nucleic acids research* 40 (7):e49-e49
- WFO (2023) *Ziziphus jujuba* var. *spinosa* (Bunge) Hu ex H.F.Chow. *Published on the Internet*; <http://www.worldfloraonline.org/taxon/wfo-0000742370>
- Wolff J, Rabbani L, Gilsbach R, Richard G, Manke T, Backofen R, Grüning BA (2020) Galaxy HiCExplorer 3: a web server for reproducible Hi-C, capture Hi-C and single-cell Hi-C data analysis, quality control and visualization. *Nucleic Acids Research* 48 (W1):W177-W184
- Wu M, Gu X, Zhang Z, Si M, Zhang Y, Tian W, Ma D (2022) The effects of climate change on the quality of *Ziziphus jujuba* var. *Spinosa* in China. *Ecological Indicators* 139:108934
- Xie Z, Wang L, Wang L, Wang Z, Lu Z, Tian D, Yang S, Hurst LD (2016) Mutation rate analysis via parent-progeny sequencing of the perennial peach. I. A low rate in woody perennials and a higher mutagenicity in hybrids. *Proc Biol Sci* 283 (1841)
- Xu Z, Wang H (2007) LTR\_FINDER: an efficient tool for the prediction of full-length LTR retrotransposons. *Nucleic Acids Res* 35 (Web Server issue):W265-268
- Zhang Z, Li J, Zhao XQ, Wang J, Wong GK, Yu J (2006) KaKs\_Calculator: calculating Ka and Ks through model selection and model averaging. *Genomics Proteomics Bioinformatics* 4 (4):259-263
- Zhao Q, Mi ZY, Lu C, Zhang XF, Chen LJ, Wang SQ, Niu JF, Wang ZZ (2022) Predicting potential distribution of *Ziziphus spinosa* (Bunge) H.H. Hu ex F.H. Chen in China under climate change scenarios. *Ecol Evol* 12 (2):e8629

## Part 3. Supplemental Tables and Figures

### Supplemental Tables

Supplemental Table 1. Statistics of reads information.

|                        |                            |                    |
|------------------------|----------------------------|--------------------|
| MGISEQ-2000 reads      | total reads                | 147,060,360        |
|                        | total bases                | 22,059,054,000 bp  |
|                        | clean reads                | 146,937,342        |
|                        | clean bases                | 20,549,591,610 bp  |
|                        | Q20 rate                   | 97.27%             |
|                        | Q30 rate                   | 92.77%             |
|                        | GC content                 | 35.95%             |
| HiFi reads             | subreads number            | 28,180,197         |
|                        | subreads bases             | 428,936,355,668 bp |
|                        | ccs reads Num              | 1,631,748          |
|                        | ccs bases                  | 28,621,088,987 bp  |
|                        | ccs reads N50              | 18,732 bp          |
|                        | ccs reads mean length      | 17,540 bp          |
|                        | ccs longest read           | 49,987 bp          |
|                        | ccs rate                   | 6.67%              |
| ONT passed reads (Q>7) | Total reads                | 1,503,196          |
|                        | Total bases                | 50,689,713,213 bp  |
|                        | reads N50 length           | 52,708 bp          |
|                        | reads mean length          | 33,721 bp          |
|                        | maximum read length        | 703,323            |
| Hi-C reads             | Number of raw read pairs   | 144,695,164        |
|                        | Number of raw bases (bp)   | 43,408,549,000     |
|                        | Number of clean read paris | 143,508,269        |
|                        | Number of clean bases (bp) | 40,114,785,000     |
|                        | Clean reads rate (%)       | 99.18              |
|                        | Clean bases rate (%)       | 92.41              |

Supplemental Table 2. BUSCO evaluation results for genome and genes.

| Classification                      | Genome       | Protein-coding genes |
|-------------------------------------|--------------|----------------------|
| Complete BUSCOs (C)                 | 1590 (98.5%) | 1512 (93.7%)         |
| Complete and single-copy BUSCOs (S) | 1569 (97.2%) | 1491 (92.4%)         |
| Complete and duplicated BUSCOs (D)  | 21 (1.3%)    | 21 (1.3%)            |
| Fragmented BUSCOs (F)               | 14 (0.9%)    | 27 (1.7%)            |
| Missing BUSCOs (M)                  | 10 (0.6%)    | 74 (4.6%)            |
| Total BUSCO groups searched         | 1614 (100%)  | 1614 (100%)          |

Supplemental Table 3. Repeat information of 'Dongzao' genome.

| Class            | Super family           | Family        | Number of family members | Length of sequence (bp) | Ratio in the genome (%) | Average length (bp) |
|------------------|------------------------|---------------|--------------------------|-------------------------|-------------------------|---------------------|
| <b>Class I</b>   |                        |               | <b>153,352</b>           | <b>114,349,303</b>      | <b>29.07</b>            | <b>745.67</b>       |
|                  | <b>LINE</b>            |               | <b>16,049</b>            | <b>4,298,506</b>        | <b>1.09</b>             | <b>267.84</b>       |
|                  |                        | L1            | 7,140                    | 3,118,613               | 0.79                    | 436.78              |
|                  |                        | L2            | 3,126                    | 393,751                 | 0.10                    | 125.96              |
|                  |                        | CR1           | 659                      | 157,028                 | 0.04                    | 238.28              |
|                  |                        | Penelope      | 1,953                    | 160,212                 | 0.04                    | 82.03               |
|                  |                        | RTE           | 600                      | 138,985                 | 0.04                    | 231.64              |
|                  |                        | Tad1          | 314                      | 71,472                  | 0.02                    | 227.62              |
|                  |                        | Other         | 2,257                    | 258,445                 | 0.07                    | 114.51              |
|                  | <b>LTR</b>             |               | <b>135,896</b>           | <b>109,668,261</b>      | <b>27.88</b>            | <b>807.00</b>       |
|                  |                        | Gypsy         | 74,326                   | 67,362,501              | 17.13                   | 906.31              |
|                  |                        | Copia         | 40,271                   | 35,511,237              | 9.03                    | 881.81              |
|                  |                        | Cassandra     | 8,327                    | 3,184,342               | 0.81                    | 382.41              |
|                  |                        | Caulimovirus  | 1,771                    | 1,380,860               | 0.35                    | 779.71              |
|                  |                        | Pao           | 1,987                    | 406,117                 | 0.10                    | 204.39              |
|                  |                        | ERV1          | 1,472                    | 61,477                  | 0.02                    | 41.76               |
|                  |                        | Ngaro         | 555                      | 92,537                  | 0.02                    | 166.73              |
|                  |                        | Other         | 984                      | 43,706                  | 0.01                    | 44.42               |
|                  |                        | Unknown       | 6,203                    | 1,625,484               | 0.41                    | 262.05              |
|                  | <b>SINE</b>            |               | <b>1,407</b>             | <b>382,536</b>          | <b>0.10</b>             | <b>271.88</b>       |
|                  |                        | tRNA-Deu      | 597                      | 52,716                  | 0.01                    | 88.30               |
|                  |                        | Other         | 406                      | 23,964                  | 0.01                    | 59.02               |
|                  |                        | Unknown       | 404                      | 305,856                 | 0.08                    | 757.07              |
| <b>Class II</b>  |                        |               | <b>97,376</b>            | <b>33,440,673</b>       | <b>8.50</b>             | <b>343.42</b>       |
|                  | <b>DNA</b>             |               | <b>86,175</b>            | <b>29,403,433</b>       | <b>7.48</b>             | <b>341.21</b>       |
|                  |                        | MULE-MuDR     | 14,422                   | 8,985,025               | 2.28                    | 623.01              |
|                  |                        | CMC-EnSpm     | 22,713                   | 8,348,069               | 2.12                    | 367.55              |
|                  |                        | hAT           | 18,645                   | 6,562,279               | 1.67                    | 351.96              |
|                  |                        | PIF-Harbinger | 7,581                    | 2,202,724               | 0.56                    | 290.56              |
|                  |                        | Maverick      | 1,628                    | 744,416                 | 0.19                    | 457.26              |
|                  |                        | Zisupton      | 3,720                    | 729,522                 | 0.19                    | 196.11              |
|                  |                        | TcMar         | 2,221                    | 557,404                 | 0.14                    | 250.97              |
|                  |                        | Crypton-V     | 1,250                    | 112,003                 | 0.03                    | 89.60               |
|                  |                        | CMC-Transib   | 802                      | 57,431                  | 0.01                    | 71.61               |
|                  |                        | Other         | 8,927                    | 411,949                 | 0.10                    | 46.15               |
|                  |                        | Unknown       | 4,266                    | 692,611                 | 0.18                    | 162.36              |
|                  | <b>Rolling circles</b> |               | <b>11,201</b>            | <b>4,037,240</b>        | <b>1.03</b>             | <b>360.44</b>       |
|                  |                        | Helitron      | 11,190                   | 4,036,790               | 1.03                    | 360.75              |
|                  |                        | Other         | 11                       | 450                     | 0.00                    | 40.91               |
| <b>Total TEs</b> |                        |               | <b>250,728</b>           | <b>147,789,976</b>      | <b>37.57</b>            | <b>589.44</b>       |
| Unknown          |                        |               | 207,507                  | 58,742,266              | 14.93                   | 283.09              |

|                      |                |                    |              |               |
|----------------------|----------------|--------------------|--------------|---------------|
| Low_complexity       | 40,918         | 1,927,480          | 0.49         | 47.11         |
| Satellite            | 648            | 84,893             | 0.02         | 131.01        |
| Simple_repeat        | 253,683        | 9,209,302          | 2.34         | 36.30         |
| Small RNAs           | 3,374          | 3,123,189          | 0.79         | 925.66        |
| <b>Total Repeats</b> | <b>756,858</b> | <b>220,877,106</b> | <b>56.16</b> | <b>291.83</b> |

Supplemental Table 4. Telomere information of the genome.

| Chromosome | Left start | Left end | Left length | Left motif | Right start | Right end  | Right length | Right motif |
|------------|------------|----------|-------------|------------|-------------|------------|--------------|-------------|
| Chr01      | 1          | 19,630   | 19,630      | CCCTAAA    | 48159139    | 48,169,259 | 10,121       | TTTAGGG     |
| Chr02      | 1          | 7,982    | 7,982       | CCCTAAA    | 34364548    | 34,383,186 | 18,639       | TTTAGGG     |
| Chr03      | 1          | 15,603   | 15,603      | CCCTAAA    | 34303592    | 34,311,561 | 7,970        | TTTAGGG     |
| Chr04      | 1          | 4,217    | 4,217       | CCCTAAA    | 33864166    | 33,874,294 | 10,129       | TTTAGGG     |
| Chr05      | 1          | 22,400   | 22,400      | CCCTAAA    | 32969164    | 32,986,920 | 17,757       | TTTAGGG     |
| Chr06      | 1          | 21,972   | 21,972      | CCCTAAA    | 32188140    | 32,197,620 | 9,481        | TTTAGGG     |
| Chr07      | 1          | 19,321   | 19,321      | CCCTAAA    | 31014812    | 31,029,268 | 14,457       | TTTAGGG     |
| Chr08      | 1          | 7,232    | 7,232       | CCCTAAA    | 30406786    | 30,413,063 | 6,278        | TTTAGGG     |
| Chr09      | 1          | 14,481   | 14,481      | CCCTAAA    | 30355812    | 30,376,005 | 20,194       | TTTAGGG     |
| Chr10      | 1          | 7,001    | 7,001       | CCCTAAA    | 29851313    | 29,861,259 | 9,947        | TTTAGGG     |
| Chr11      | 1          | 20,425   | 20,425      | CCCTAAA    | 28775052    | 28,782,057 | 7,006        | TTTAGGG     |
| Chr12      | 1          | 28,497   | 28,497      | CCCTAAA    | 26943421    | 26,948,440 | 5,020        | TTTAGGG     |



Supplementary Table 5. Position and monomers of centromeres in each chromosome.

| Chromosome | Start      | End        | Monomers                                                                                                                                                                                                                                                                                                                                             |
|------------|------------|------------|------------------------------------------------------------------------------------------------------------------------------------------------------------------------------------------------------------------------------------------------------------------------------------------------------------------------------------------------------|
| Chr01      | 26,830,000 | 27,420,000 | AGGCCAAATGACTTATATGTATTGATACAGCAAAAATTGGTTAATATAGTGTTAGGCGACGCATTAT<br>TTAAACAATGCGTCAACCAATACATGAACAGGCGACGCATTCTTCAACAAATGCATCGCCTGTTCTT<br>TTTTTTTTTCAATTTTTTTTTTAAACATTTAAAAAAAATAAAATCAAATAGGCCATAACAAGAATTGAA<br>CCCAGGACCTCCTACACTCTCAAGAAATCACCACACCACC                                                                                      |
| Chr02      | 19,184,195 | 19,831,362 | ACTTCGGAGTTCTGATGGGATCCGGTGCATTAGTGCTGGTATGATCGCACCCGACATGGTGATGC<br>TAAAGAATGGATATAAGGAAAAGAAGCAGCGCAGCAGGTCCGCATGCGTTCGGCGCGATCCGGG<br>CAGCGGCATCGACGCACCGGCCACCGAGCGAGTTCCTCGGTCCGGGCCGGGAGAAAAGGGAA<br>ACTCCGAGGGTCAAAGGCGCGGGGAAAGAGAGGAAAAAAAAAAAAAAAAAGGGGTGCAACACGAG<br>GACTTCCCAGGAGGTCACCCATCCTAGTACTACTCTCGCCCAAGCACGCTTA                 |
| Chr03      | 19,565,198 | 19,584,621 | AAAAAAAAAAAAACAAAAAACTCTCTTTATATTGTTTAAATATCTTCACTGGTTATTTTCATGCTGA<br>AGAAAATCAAATTGTTAAAAATGAAGGTTTAAAAAATATATATATATAGGGTATTAGGCGACGCAT<br>AATCATGATTATGCGTCGCCTAAACTAAATT                                                                                                                                                                         |
| Chr04      | 9,031,791  | 9,365,128  | ATTAAAAAAAAAAAAAAAAAACTCTCATTTATCTTGTTTAAATATTTTCACTGGTTATTTGATGCTGGA<br>AGAAAATCAAATTGTTAAAAAGAAGGTTTTAAAAAAAATAAATAGGGTATTAGGCGACGCATAATAC<br>TGATTATGCGTCGCCTAAACTAA                                                                                                                                                                              |
| Chr05      | 160,000    | 220,000    | ATTTGTTTTTTCGTTGGAGGCCAGGGGTTTGGTGGGATTTTGCTATTGGAGTTGCTATTTGATTGC<br>TAATTTTTGTGACTGGAGGTGAGTTTGGTATTACAGTTAACAGAAAAAGAAATTAGCTAAATTTGTT<br>TTCAAGCCCTTGAGGTCAACAGTTGGTCTATTTTAAATTGAAGTTTGGTACGATTGAGATTTCTTTAC<br>TTTTATAAAGCTTGTTATTCTTGCTTGAATGCAAAAAAATAAAAATAAAAAAATAAAAAAATAAA<br>AGAAAAAGAAAAAGAAGAAGGGTTTGCAGAAATTTAAAAAAAAAAAAAAAAACAGCAC |
| Chr06      | 3,769,625  | 4,171,787  | ATTTCTTTCAACTTTAAATAACAAGTGAATGTTATAGCTACTTCACAATGTTTTTTTTTTTTGTTTT<br>TGTCATTGAAATATTTTAGAAAATACGTTATTGATATATAGCGACGCATAAATACCATTATGCGTC<br>GCCTATTATTGTGAAATTTCTTTTTTTTTTTGTTTTTTTTCTAAGTCTAAAACGGTTT                                                                                                                                              |
| Chr07      | 22,563,313 | 22,782,010 | TTTTTTTTTTTTTAAACCTTCCTTTTTAAACAATTTGATTTCTTCCAGCATCAAATAACCAGTGAAA<br>ATATTTAAACAAGATAAAGAGAGTTTTCTTTTTTTTTTAATTATAGTAATAGGCGACGCATAAGCAGT<br>ACTATGCGTCGCCTAATACCCAATTT                                                                                                                                                                            |
| Chr08      | 24,604,388 | 24,623,002 | CTGGAAAAATTACCGACGGTTTCGTCCGGGAATCCCGAGGGTGTACAGTCCATCACATTTTACCAA<br>TTTTTTGGGCCCCACAAGGCCCTAAGGTGTGTTGAATGCAAAAACATGCAAAATAGGGATTCTAT<br>AATTGTAATAAGGAGAGAAAAGATCAAATTTAATAAAAAGTGTATCAAATTTGCAAAAAATAGGAT<br>GACTGTTACCCCTCGGTAATTCCTGAGGAAAACGTCCGTAACCACCAAATCCCCT                                                                             |

|       |            |            |                                                                                                                                                                                                                                                                                                                                                                                                                                                                                                                                                                                                                                                                                                         |
|-------|------------|------------|---------------------------------------------------------------------------------------------------------------------------------------------------------------------------------------------------------------------------------------------------------------------------------------------------------------------------------------------------------------------------------------------------------------------------------------------------------------------------------------------------------------------------------------------------------------------------------------------------------------------------------------------------------------------------------------------------------|
| Chr09 | 28,671,183 | 28,719,051 | <p>TGTTACGGAATTGGGAGAAAAACAAATAGCAACGGAAACAAAGAAAGCGAAGAACAACACAAATT<br/> AACGTGGAAACCCTTGATGGGAAAAACACGGGCAGGGAGAACAATCCAATATCGAAAGATTGG<br/> TACAAAAGGTGAGCCTGACTGCGGATACCTTCTAACCCCTAATTACAGCCGAAAATAAATATATA<br/> TAGTACAGAAGAAACCCTAAAATTGAACAGACGGTGTACCTTCAACCATAGAAAAGGGTGTATAGAC<br/> GGTGCTTCGCAATCAGTTTCGTTGTGAGATTCTTTGTGATGTACAAAGATTCCAATTGTCCATAA<br/> GTCCTTTGTTGCTTTTTGATCAAGGACCTCCCTCAAACCTTCATTGGACAAGCATAGCTGAATGGT<br/> GGATAGGGCACGCTCATCAACCTCGGTTTTCTTTTCGGCATCCACGAAGACGGCATCTGCTCCT<br/> TGCCAACCAACGCCTTGTGTAACCGTTCTGTGTCAAATCGCCTTCATCTTGACTTGCCACATGG<br/> AGAAACTCATGTTGCGCTCAAATTTCTCAATGTCGAACTTTGTTGCCATGATCGAAAGAAAAAAAT<br/> TCCCAAATAGATCGATGCGGCTCTGATACCACT</p> |
| Chr10 | 27,753,093 | 27,910,515 | <p>GTTGCTTAAATATTTTACGGATGATTTGATGCTGAAAGAAAATCAGATAGATTAAGAGAAGATTAC<br/> ACACACAAAAAAAAAAAAAAAAATTTTATTTGCTAACAAAGCGACGCATAAGTAGTTTTATGCGTCGCCTC<br/> TTACCATGATCTAAAAAAAAAATGTTAATTTAATAA</p>                                                                                                                                                                                                                                                                                                                                                                                                                                                                                                        |
| Chr11 | 13,632,283 | 13,868,269 | <p>AAAAAAAAAAAACTCTTTTTATTGTTTAAATATTTTCACTGGTTATTTGATGCTGCAAGAAAATCAA<br/> TTGTTAAAAAGCAAGTTTTAAAAAAAAAAAAAAAAAATAGGGTATTAGGCGACGCATAGTACTG<br/> ATTATGCGTCGCCTATTACTATAATTA</p>                                                                                                                                                                                                                                                                                                                                                                                                                                                                                                                       |
| Chr12 | 8,013,393  | 8,039,969  | <p>AAAAAAAAAAAAAAGCACTGTGATGCTGCTTAAACATTTTCACTTGTTATTTAAAGTTGAAAGAAA<br/> ATCAACTGTTTAATACTTAGAAAAACACAAAAAAAAAATTATTACACTAATAGGCGACGCATAATA<br/> GTGTGTCTGCGTCGCCTGATATCAATAATATGTCTTCAAAAAATTTTTTG</p>                                                                                                                                                                                                                                                                                                                                                                                                                                                                                               |

Supplemental Table 6. Collinear genes in paralogs and orthologs.

| Species name   | Collinear genes | Percentage | Paralog pairs in peak 1 (Ks<0.7 or 4DTv<0.25) | Paralog pairs in the peak 2 (0.7<Ks<3.0 or 0.25<4DTv<1.2) | No. of genes in Peak 1 | No. of genes in Peak 2 | No. of genes in shared by Peak 1 and 2 |
|----------------|-----------------|------------|-----------------------------------------------|-----------------------------------------------------------|------------------------|------------------------|----------------------------------------|
| Dongzao        | 4,542           | 15.33      | 596                                           | 2,144                                                     | 745                    | 3,808                  | 11                                     |
| Junzao         | 4,249           | 15.06      | 399                                           | 1,707                                                     | 660                    | 3,101                  | 25                                     |
| Suanzao        | 4,752           | 15.27      | 411                                           | 2,109                                                     | 794                    | 3,730                  | 87                                     |
| <i>Populus</i> | 21,530          | 52.03      | 10,097                                        | 4,842                                                     | 20,058                 | 5,903                  | 4,431                                  |
| <i>Prunus</i>  | 4,107           | 16.41      | --                                            | 2,064                                                     | --                     | 3,660                  | 0                                      |

Supplemental Table 7. Statistics of Hi-C reads mapping to the genome.

| Mapping information                      |            |
|------------------------------------------|------------|
| Unmapped Paired-end Reads                | 4,113,168  |
| Unmapped Paired-end Reads Rate (%)       | 2.86       |
| Paired-end Reads with Singleton          | 20,909,998 |
| Paired-end Reads with Singleton Rate (%) | 14.57      |
| Unique Mapped Paired-end Reads           | 68,145,208 |
| Unique Mapped Ratio (%)                  | 47.49      |
| Classification of unique mapped reads    |            |
| Dangling End Paired-end Reads            | 6,916,309  |
| Religation Paired-end Reads              | 1,209,022  |
| Self-Circle Paired-end Reads             | 30,297     |
| Dumped Paired-end Reads                  | 1,748      |
| Valid Paired-end Reads                   | 59,987,832 |
| Vaild reads of unique mapping reads (%)  | 88.03      |
| Vaild reads of clean reads (%)           | 41.80      |

Supplemental Table 8. The TAD information.

| Class    | Number | Max len (bp) | Min len (bp) | Median len (bp) | Mean len (bp) | Size (Mb) | Percentage | Genes  |
|----------|--------|--------------|--------------|-----------------|---------------|-----------|------------|--------|
| Domain   | 2,428  | 1,550,000    | 10,000       | 130,000         | 149,805       | 363.73    | 92.47%     | 27,203 |
| Boundary | 573    | 100,000      | 20,000       | 30,000          | 33,962        | 19.46     | 4.95%      | 2,145  |
| Gap      | 241    | 1,659,268    | 10,000       | 16,005          | 43,542        | 10.15     | 2.58%      | 285    |

Supplemental Table 9. Gene expression and function of 51 predicted genes in the TAD located in Chr05:4.28-5.83 Mb.

| Gene name | FPKM | Function or chloroplast gene name | Gene name | FPKM | Function or chloroplast gene name |
|-----------|------|-----------------------------------|-----------|------|-----------------------------------|
| Chr05.694 | 0    | Antisense to 16S rRNA             | Chr05.771 | 0    | NA                                |
| Chr05.695 | 0    | ycf2                              | Chr05.773 | 0    | psaA                              |
| Chr05.698 | 0    | psbC                              | Chr05.797 | 0    | transposition, RNA-mediated       |
| Chr05.699 | 0    | ycf3                              | Chr05.822 | 0    | transposition, RNA-mediated       |
| Chr05.702 | 0    | atpB                              | Chr05.824 | 0    | rbcL                              |
| Chr05.703 | 3.7  | rbcL                              | Chr05.838 | 0    | rps11                             |
| Chr05.709 | 0    | atpA                              | Chr05.846 | 0    | rbcL                              |
| Chr05.710 | 0    | transposition, RNA-mediated       | Chr05.848 | 0    | rpoC2                             |
| Chr05.712 | 0    | ycf2                              | Chr05.852 | 0    | psaB                              |
| Chr05.713 | 0    | psbA                              | Chr05.853 | 0    | rpoA                              |
| Chr05.714 | 0    | atpA                              | Chr05.861 | 0    | ycf68                             |
| Chr05.715 | 0    | psbB                              | Chr05.868 | 0    | psbB                              |
| Chr05.727 | 0    | ndhK                              | Chr05.871 | 0    | rpoA                              |
| Chr05.737 | 0    | Antisense to 23S rRNA             | Chr05.872 | 0    | ycf2                              |
| Chr05.743 | 0    | ndhB                              | Chr05.882 | 0    | petA                              |
| Chr05.744 | 0    | ycf2                              | Chr05.883 | 0    | rps12                             |
| Chr05.745 | 0    | TMV resistance protein N-like     | Chr05.901 | 0    | ycf2                              |
| Chr05.751 | 0    | Photosystem II protein            | Chr05.921 | 0    | NA                                |
| Chr05.753 | 0    | psaB                              | Chr05.936 | 0    | ycf68                             |
| Chr05.756 | 0    | psbB                              | Chr05.938 | 0    | rpoC1                             |
| Chr05.760 | 0    | NA                                | Chr05.940 | 0    | psbC                              |
| Chr05.762 | 0    | rpl2                              | Chr05.941 | 0    | psaB                              |
| Chr05.765 | 0    | rpoC2                             | Chr05.944 | 0    | rbcL                              |
| Chr05.766 | 0    | psbD                              | Chr05.949 | 0.14 | psbD                              |
| Chr05.767 | 0    | psaA                              | Chr05.952 | 0    | NA                                |
| Chr05.768 | 0    | Cytochrome f                      | --        | --   | --                                |

Supplemental Table 10. The corresponding relationship of MDHAR genes with those in Liu et al. 2014.

| MDHAR gene ID in this study | Average FPKM in 16 tissues | The Highest FPKM in 16 tissues | The tissue with highest FPKM | Corresponding genes in (Liu et al. 2014) | Scaffolds of NGS genes in (Liu et al. 2014) | Phylogeny group in (Liu et al. 2014) |
|-----------------------------|----------------------------|--------------------------------|------------------------------|------------------------------------------|---------------------------------------------|--------------------------------------|
| Chr01.4867                  | 7.05                       | 18.71                          | Seedling                     | NA                                       | NA                                          |                                      |
| Chr01.4869                  | 0.04                       | 0.28                           | Stem                         | CCG016762.1, CCG016763.1                 | scaffold402                                 | V                                    |
| Chr01.4870                  | 0.00                       | 0.06                           | Flower                       | CCG016764.1                              | scaffold402                                 | V                                    |
| Chr01.4871                  | 0.00                       | 0.00                           | NA                           | NA                                       | NA                                          |                                      |
| Chr01.4877                  | 0.24                       | 0.87                           | Root                         | CCG016765.1                              | scaffold402                                 | V                                    |
| Chr01.4878                  | 0.04                       | 0.48                           | Root                         | CCG016766.1                              | scaffold402                                 | V                                    |
| Chr01.4879                  | 0.00                       | 0.00                           | NA                           | CCG016767.1                              | scaffold402                                 | V                                    |
| Chr01.4882                  | 0.00                       | 0.00                           | NA                           | NA                                       | NA                                          |                                      |
| Chr01.4890                  | 0.03                       | 0.17                           | Branch                       | NA                                       | NA                                          |                                      |
| Chr01.4891                  | 0.02                       | 0.31                           | Root                         | NA                                       | NA                                          |                                      |
| Chr01.4892                  | 1.82                       | 14.91                          | Stem                         | NA                                       | NA                                          |                                      |
| Chr01.4893                  | 1.78                       | 12.15                          | Stem                         | NA                                       | NA                                          |                                      |
| Chr01.4894                  | 4.87                       | 13.98                          | Leaves                       | CCG022250.1, CCG022251.1                 | scaffold627                                 | V                                    |
| Chr11.1336                  | 307.99                     | 662.00                         | Seedling                     | CCG023124.3                              | scaffold671                                 | III                                  |
| Chr06.3975                  | 15.84                      | 54.95                          | Seedling                     | CCG013319.1                              | scaffold285                                 | II                                   |
| Chr04.4579                  | 20.49                      | 78.24                          | Branch                       | CCG001931.1                              | scaffold113                                 | I                                    |

Note: Shaded part is the tandem expanded MDHAR genes in jujube.

## Supplemental Figures

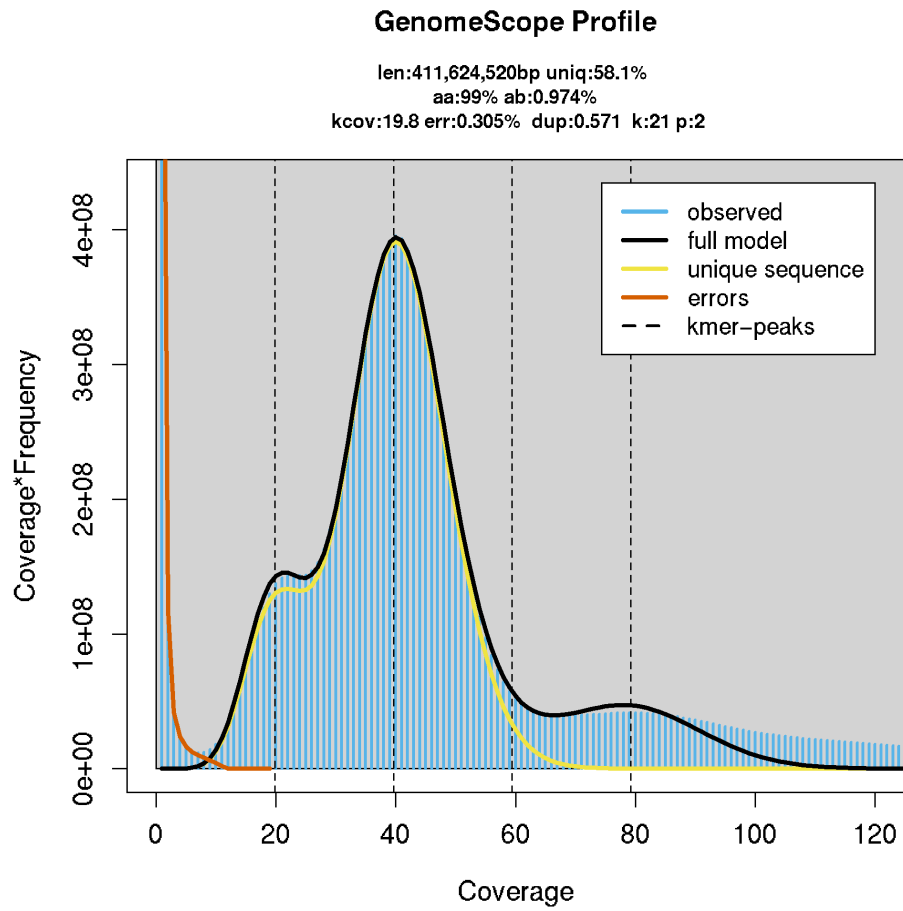

Supplemental Figure 1. Genome size estimation results using GenomeScope2 based on MGISEQ-2000 clean reads.

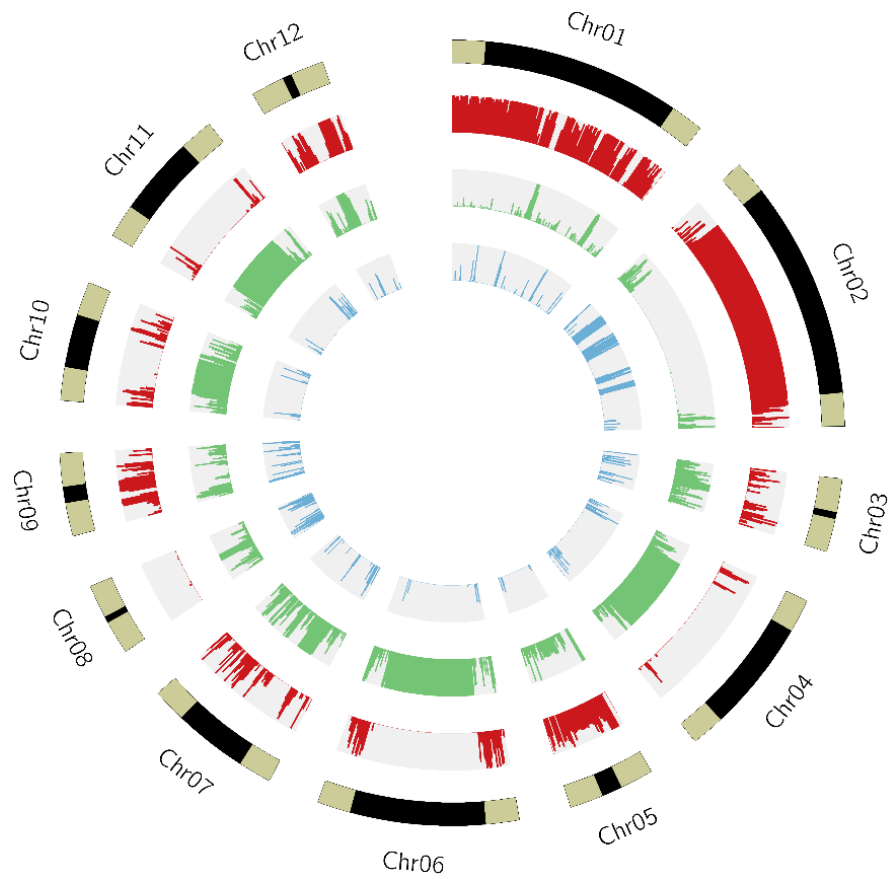

**Supplemental Figure 2.** The centromere sequences (in black) and their 100 kb flanking regions (in cyan) are displayed in the outer circle. The chromosome position for each centromere can be found in Supplemental Table 5. The LTR-transposons (red), non-LTR repeats (green), and protein gene transcripts (blue) are represented, respectively, by the second, third, and fourth circles (from outer to inner).

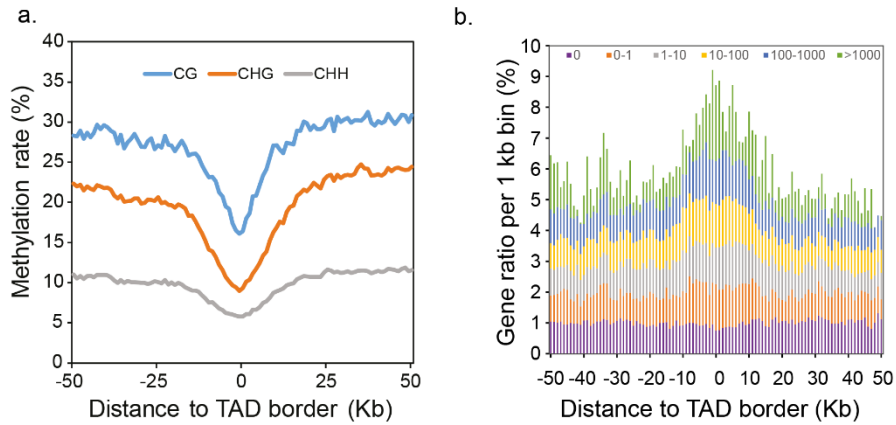

**Supplemental Figure 3.** Methylation and gene expression at TAD borders. (a) The methylation at the TAD boundary and the flanking 50 kb regions. (b) Histogram of the gene expression alternation at the TAD boundary and the flanking 50 kb regions.

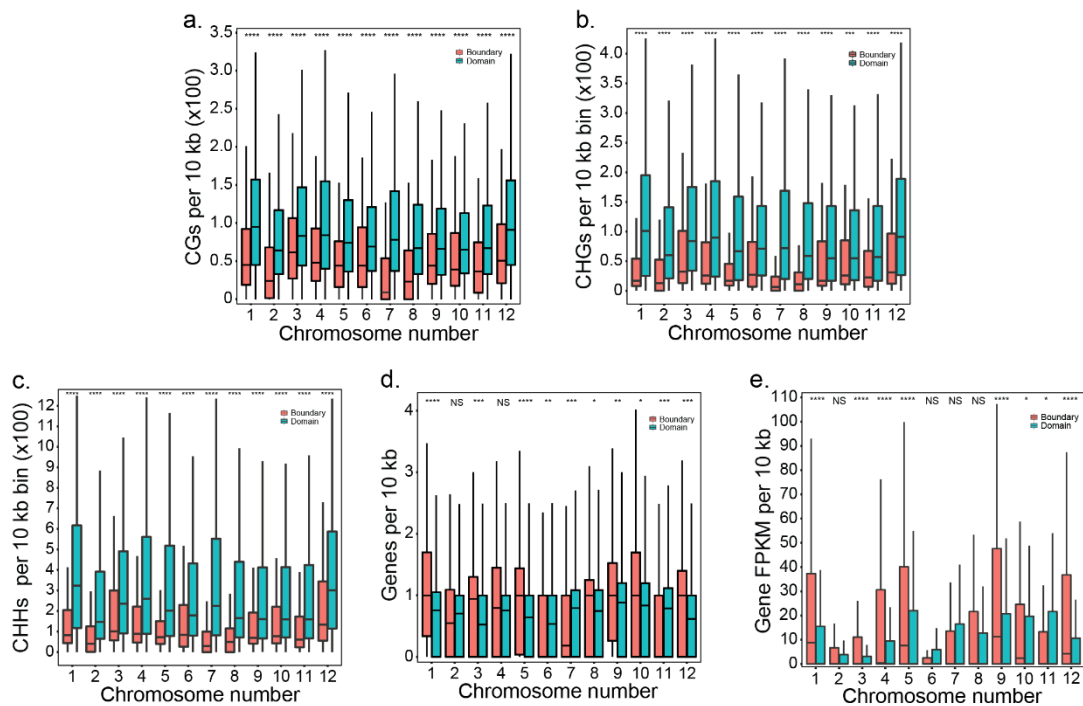

**Supplemental Figure 4.** Boxplot of methylations and genes features in a 10 kb bin distributed within TAD and in TAD boundary. (a-e) average number of methylated CGs, CHGs and CHHs, number of genes, and gene FPKMs in a 50 kb bin distributed in TAD and in TAD boundary. Asterisks indicate statistically significant differences from the Wilcoxon rank sum test (\*  $p < 0.05$ , \*\*  $p < 0.01$ , \*\*\*  $p < 0.001$ , \*\*\*\*  $p < 0.0001$ , NS, not significant).



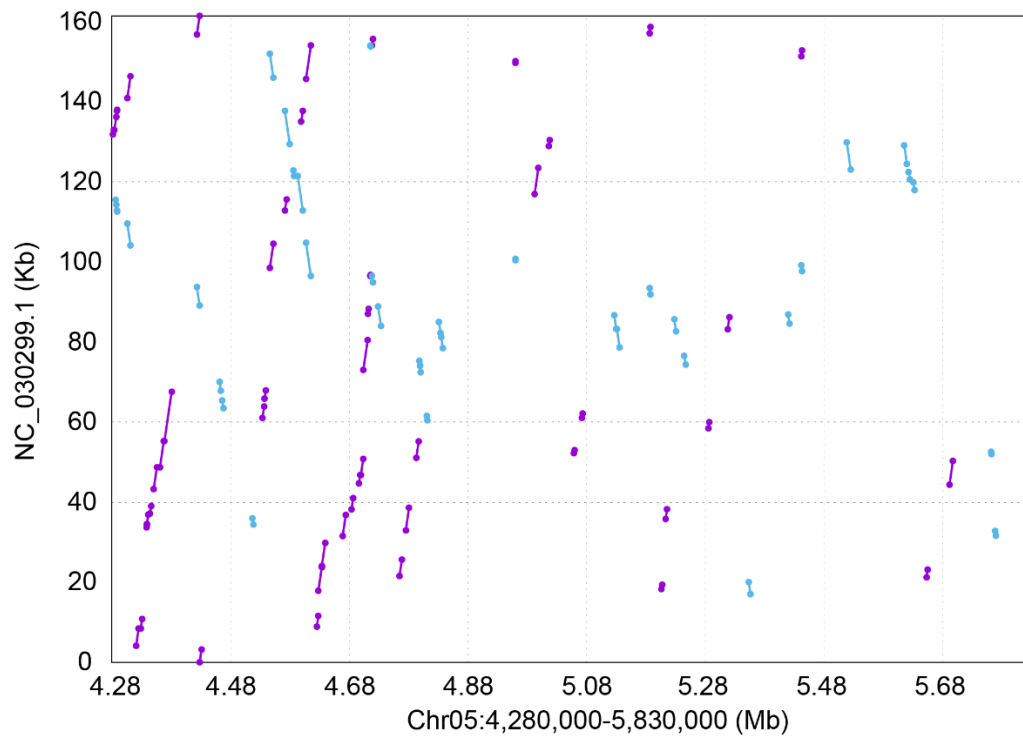

**Supplemental Figure 5.** Horizontal transfer of chloroplast fragments to the nuclear genome occurred on the largest TAD located in chromosome five between 2.8 Mb and 5.83 Mb. The jujube chloroplast genome (NC\_030299.1) was obtained from NCBI. In the total 1.55 Mb region of this TAD, 227 Kb are aligned to the chloroplast genome with an average identity of 93.22%, covering 140 Kb (86.83%) of the chloroplast genome.

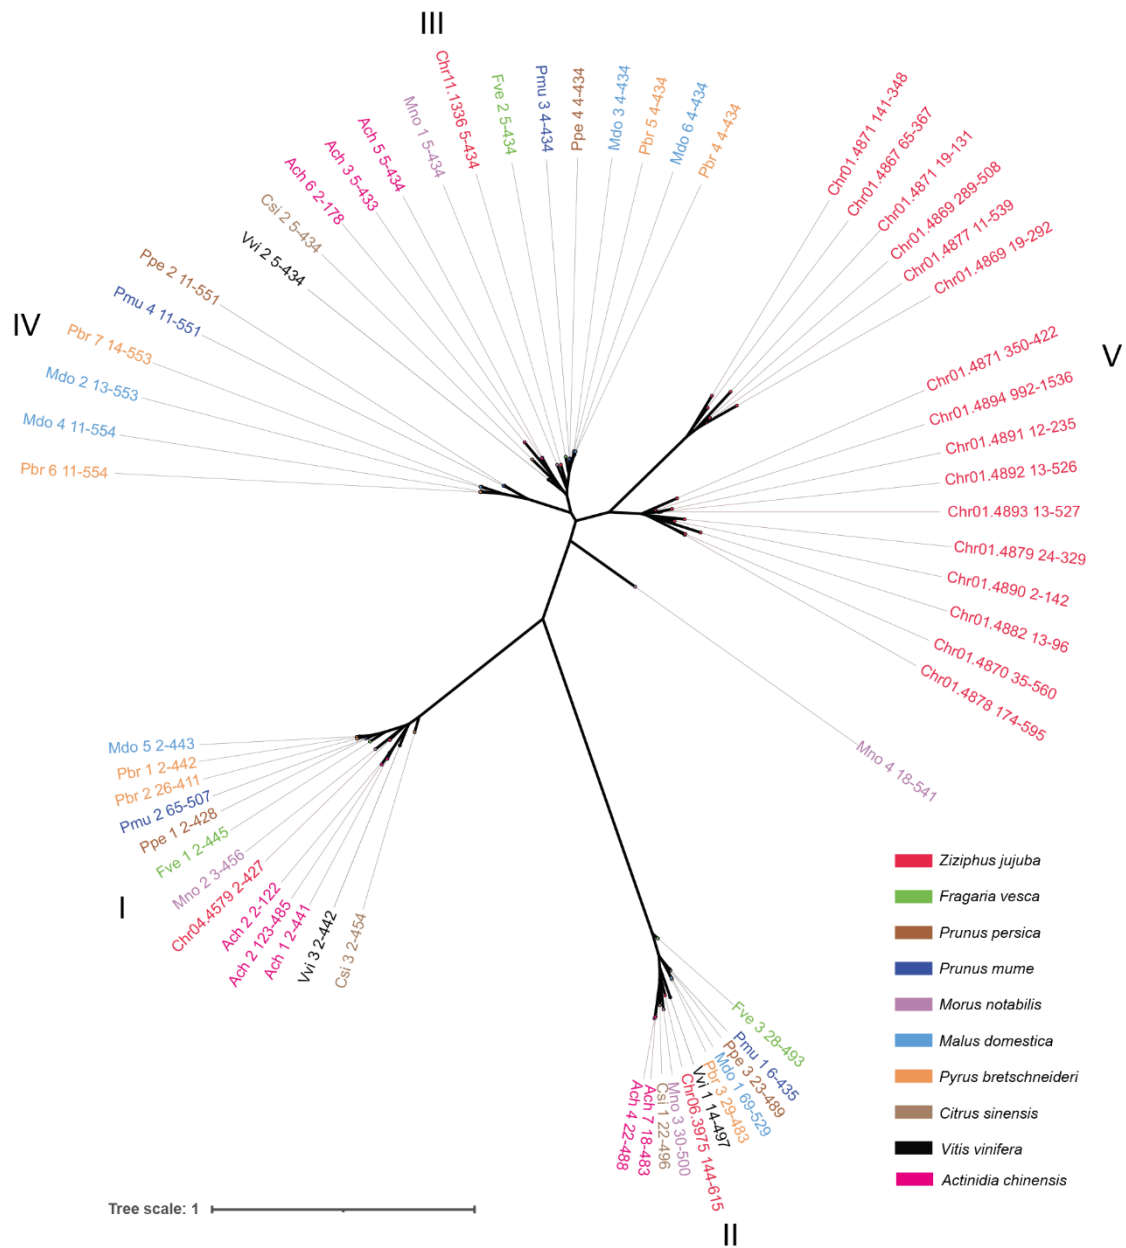

**Supplemental Figure 6.** An updated phylogenetic tree of the MDHAR gene family compared to (Liu et al., 2014) in jujube and nine related species. Group V is the jujube-specific MDHARs containing 13 members. The tree was built with the IQTREE software using the core domain region of protein sequences, and the start and end positions of the region for each gene are indicated after the gene name. The abbreviation name for each species and the corresponding accession number of NCBI are listed as: Csi 1 (XP 006476500), Csi 2 (XP 006481820), Csi 3 (XP 006470310), Fve 1 (XP 004304631), Fve 2 (XP 004303012), Fve 3 (XP 011463921), Mdo 1 (XP 017181664), Mdo 2 (XP 008366501), Mdo 3 (XP 008391762), Mdo 4 (XP 008370471), Mdo 5 (XP 008341454), Mdo 6 (XP 028946174), Mno 1 (XP 024032990), Mno 2 (XP 024029543), Mno 3 (XP 010089047), Mno 4 (XP 010089361), Pbr 1 (XP 009377205),

Pbr 2 (XP 048433812), Pbr 3 (XP 048446112), Pbr 4 (XP 009374749), Pbr 5 (XP 009366639), Pbr 6 (XP 018499810), Pbr 7 (XP 009334596), Pmu 1 (XP 016651062), Pmu 2 (XP 008230586), Pmu 3 (XP 008241272), Pmu 4 (XP 008226785), Ppe 1 (XP 007215303), Ppe 2 (XP 020417215), Ppe 3 (XP 007209972), Ppe 4 (XP 007202072), Vvi 1 (XP 010658330), Vvi 2 (XP 010653731), Vvi 3 (XP 002277200), Ach 1 (PSR87572), Ach 2 (PSS30380), Ach 3 (PSS15949), Ach 4 (PSS09385), Ach 5 (PSS01382), Ach 6 (PSR98500), Ach 7 (PSR91476).
